**Running head:** *WRKY1* regulates light and nitrogen signaling pathways

**TITLE:** *WRKY1* mediates transcriptional crosstalk between light and nitrogen signaling pathways in *Arabidopsis thaliana*

**Authors:** Sachin Heerah<sup>1,\*</sup>, Manpreet Katari<sup>2</sup>, Rebecca Penjor<sup>2</sup>, Gloria Coruzzi<sup>2</sup>, and Amy Marshall-Colon<sup>1,\*</sup>

1. Department of Plant Biology, University of Illinois, 1201 W Gregory Dr, Urbana, IL 61801

2. Center for Genomics & Systems Biology, New York University, 12 Waverly Place, New York, NY 10001

**Summary:** Based on transcriptome analysis, the *WRKY1* transcription factor mediates regulation of nitrogen and light signaling pathways in a potential energy conservation mechanism.

### **Financial sources**

GC: This work was supported by NIH R01-GM032877 to GC and NSF MCB-0929338 to GC

AMC: NIH National Research Service Award Grant GM095273

### **Corresponding author**

Amy Marshall-Colon: [amymc@illinois.edu](mailto:amymc@illinois.edu)

### **Author responsibilities**

AMC designed the research, performed the research, analyzed data, and wrote the paper. GC designed the research and wrote the paper. MK analyzed data and wrote the paper. RP assisted AMC with experiments. SH performed experiments, analyzed data, and wrote the paper.

## ABSTRACT

Plant responses to multiple stimuli must be integrated to trigger transcriptional cascades that lead to changes in plant metabolism and development. Light (L) and nitrogen (N) are two signaling pathways that are intimately connected to each other and to plant energy status. Here, we describe the functional role of the WRKY1 transcription factor in mediating the regulation between L and N signaling pathways in *Arabidopsis thaliana*. WRKY1 participates in genome-wide transcriptional reprogramming in leaves in response to individual and combined L and N signals. A regulatory network was identified, consisting of 724 genes regulated by WRKY1 and involved in both N and L signaling pathways. The loss of WRKY1 gene function has marked effects on the L and N response of genes involved in N uptake and assimilation (primary metabolism) as well as stress response pathways (secondary metabolism). Our results support a model in which WRKY1 enables plants to activate genes involved in the recycling of cellular carbon resources when L is limiting but N is abundant, and up-regulate amino acid metabolism genes when both L and N are limiting. In this potential energy conservation mechanism, WRKY1 integrates responses to N and light-energy status to trigger changes in plant metabolism.

## 1 INTRODUCTION

2 As sessile organisms, plants perceive multiple stimuli and must dynamically respond to complex  
3 environmental challenges in order to survive. Response to stimuli or stresses occur via signal  
4 transduction pathways that initiate transcriptional responses. Signal response pathways do not  
5 often act alone, but instead interact with other signaling pathways within a cell or tissue,  
6 ultimately resulting in emergent properties in the underlying gene regulatory networks. These  
7 pathways are likely connected via integrator molecules that mediate some common effects (Chen  
8 *et al.*, 2013, Matioli *et al.*, 2011, Seo and Park, 2010). Light (L) and nitrogen (N) are two  
9 signaling pathways that are closely connected (Oliveira *et al.*, 1999; Oliveira *et al.*, 2001; Reed *et al.*,  
10 1983; Riens and Heldt, 1992; Chen *et al.*, 2016). Nitrogen assimilation is dependent on  
11 reducing power and carbon skeletons derived from photosynthesis, while the photosynthetic  
12 apparatus is dependent on N availability to support the formation of chlorophyll and other  
13 components necessary for biomass accumulation (Blaesing *et al.*, 2005; Lillo 2008; Matt *et al.*,  
14 2001a; Matt *et al.*, 2001b). In addition, increasing evidence supports the notion that  
15 transcriptional crosstalk occurs between light and nitrogen signaling pathways in leaves to fine-  
16 tune plant energy status (Jonassen *et al.*, 2008; Krouk *et al.*, 2009; Nunes-Nesi *et al.*, 2010;  
17 Obertello *et al.*, 2010).

18 Knowledge about the regulation of genes commonly involved in L and N signaling  
19 pathways by transcription factors (TFs) is limited. Whole transcriptome analysis of Arabidopsis  
20 transcriptional response to different combinations of carbon (C), nitrogen, and light treatments  
21 revealed a change in expression of several genes, including a few known TFs (Krouk *et al.*,  
22 2009). That prior study revealed that 35% of the genome is controlled by L, C, or N signals or  
23 the combination of any of these signals (Krouk *et al.*, 2009). A few shared elements in light and  
24 N signal transduction pathways have also been identified by studying the Arabidopsis bZIP TFs  
25 including bZIP1 (Obertello *et al.*, 2010) and HY5/HYH (Jonassen *et al.*, 2008). Genome-wide  
26 analysis of *bzip1* mutant seedlings revealed 33 genes with a significant interaction term for  
27 genotype, L, and N treatments, indicating that bZIP1 regulates a small group of genes involved  
28 in both L and N sensing (Obertello *et al.*, 2010). HY5 and HYH were found to be essential for  
29 light-activated/phytochrome-mediated expression of nitrate reductase (Jonassen *et al.*, 2008), in  
30 which the enhancement of NIA2 expression by light is dependent on HY5/HYH (Jonassen *et al.*,  
31 2009). It was also shown that HY5 is a shoot-to-root mobile TF that mediates the light activated

32 N uptake by inducing expression of the NO<sub>3</sub><sup>-</sup> transporter NRT2.1 (Chen et al., 2016). Thus,  
33 despite the many and varied interactions between N and L signaling pathways, to our knowledge,  
34 only TFs from the bZIP gene family have been experimentally validated to integrate responses to  
35 both N and L signal transduction pathways.

36 During our previous work on Arabidopsis gene regulation by N status, we used network  
37 analysis to predict regulatory connections between genes and associated TFs (Gutierrez *et al.*,  
38 2008). We identified several TFs involved in positive and negative regulation of organic N  
39 metabolism and catabolism. Three regulatory hubs of an organic-N regulatory network identified  
40 were CCA1, GLK1, and bZIP1 (Gutierrez *et al.*, 2008), each of which have been implicated in N  
41 and/or L signaling pathways (Wang and Tobin, 1998; Waters *et al.*, 2009; Maekawa *et al.*, 2015;  
42 Dietrich *et al.*, 2011; Obertello *et al.*, 2010). Indeed, independent experiments revealed that  
43 CCA1, GLK1 (Gutierrez *et al.*, 2008), and bZIP1 (Gutierrez *et al.*, 2008; Obertello *et al.*, 2010;  
44 Baena-Gonzalez *et al.*, 2008; Deitrich *et al.*, 2011; Para *et al.*, 2014) are involved in the  
45 regulation of genes in response to N and/or L signals. Our subsequent analysis of the N regulated  
46 genes described in Gutierrez *et al.* (2008) revealed an additional TF hub, WRKY1, which was  
47 also previously shown to be regulated by light (Krouk *et al.*, 2009).

48 WRKY1 is a member of the WRKY family of TFs, which have diverse regulatory  
49 functions in response to biotic and abiotic stresses (Jia *et al.*, 2015; Wei et al., 2008). WRKY  
50 TFs have been shown to activate or repress transcription and in some instances have dual  
51 activator/repressor functions. For example, OsWRKY72 and OsWRKY77 activate ABA  
52 signaling and repress GA signaling in rice (Xie *et al.*, 2005). AtWRKY1 also plays a key role in  
53 the regulation of genes involved in ABA signaling and drought response in Arabidopsis (Qiao et  
54 al., 2016). Additional studies showed that other WRKY TFs respond to and also regulate gene  
55 response to light signals, where expression of AtWRKY22 is induced by light and repressed by  
56 dark treatment (Zhou *et al.*, 2011; Nozue *et al.*, 2013), while AtWRKY40 and AtWRKY63  
57 repress or activate genes involved in high light signaling, respectively (Van Aken *et al.*, 2013).  
58 Additionally, WRKY TFs have been implicated in nutrient deficiency response signaling  
59 pathways, where AtWRKY75 is induced by P<sub>i</sub> starvation (Devaiah *et al.*, 2007) and AtWRKY45  
60 and AtWRKY65 are induced by carbon starvation (Contento *et al.*, 2004). Likewise, previous  
61 studies in Arabidopsis (Col-0) revealed that WRKY1 expression is repressed by organic-N  
62 treatment (Gutierrez *et al.*, 2008) and induced by N starvation (Krapp *et al.*, 2011). Here, we

63 describe i) how WRKY1 participates in genome-wide transcriptional reprogramming of  
64 Arabidopsis leaves in response to individual and combined light and nitrogen treatments, and ii)  
65 its potential role as an integrator of L and N signaling pathways toward the fine-tuning of plant  
66 energy status.

67

## 68 **RESULTS**

### 69 ***Gene regulatory network analysis reveals that WRKY1 is a hub in the nitrogen assimilation*** 70 ***pathway***

71 Our previous studies of N-regulatory networks in Arabidopsis identified a subnetwork of 367  
72 connected nodes, including WRKY1 (Supplemental Data Set 1; Gutierrez et al 2008). In that  
73 initial network, protein:DNA interactions were predicted based on an overrepresentation of the  
74 regulatory motif for that transcription factor, and the expression of the transcription factor and  
75 putative target gene was highly ( $\geq 0.7$  or  $\leq -0.7$ ) and significantly ( $P \leq 0.01$ ) correlated  
76 (Gutierrez *et al.*, 2008). Subsequent Chromatin-IP analysis of a top hub (CCA1), in combination  
77 with bioinformatic CRE-motif analysis, revealed that the presence of a single binding site was  
78 sufficient for direct regulation of the target gene by the TF (Gutierrez *et al.*, 2008). Based on  
79 these experimental results, we reanalyzed the N-response data in Gutierrez *et al.* (2008) by  
80 relaxing the predicted protein:DNA interaction to require a minimum of single regulatory motif  
81 for the TF in the promoter of a putative target, rather than an overrepresentation of binding sites.  
82 This resulted in an updated N-regulatory subnetwork, which increased the number of regulatory  
83 edges from WRKY1 to putative target genes (Supplemental Data Set 1). In this refined  
84 regulatory network, WRKY1 is one of the most highly connected TFs directly associated with  
85 metabolic genes involved in N assimilation, such as GDH1 (glutamate dehydrogenase), NIA1  
86 and NIA2 (nitrate reductase 1 and 2), and ASN1 (asparagine synthetase), in which WRKY1 is  
87 predicted to activate GDH1, NIA1 and NIA2, and repress ASN1 (Supplemental Figure 1;  
88 Supplemental Table 1).

89

### 90 ***WRKY1 target genes are involved in Nitrogen and Light signaling pathways***

91 WRKY1 is predicted to be a major hub of an organic-N regulatory network (Gutierrez 2008),  
92 and is predicted to transcriptionally repress expression of ASN1, a gene regulated in response to  
93 light, nitrogen and carbon signaling (Thum *et al.*, 2003). Here, we attempt to validate the

94 involvement of WRKY1 as a hub of a nitrogen and light signaling network, by exposing *wrky1*  
95 mutant plants to N and L treatments. To test this, we compared three T-DNA alleles of WRKY1:  
96 *wrky1-1* (SALK\_070989), *wrky1-2* (SALK\_016954) and *wrky1-3* (SALK\_136009) to wild-type  
97 Col-0 (the genetic background of the mutants). The *wrky1* mutant phenotype (SALK\_016954)  
98 was previously described by (Qiao et al., 2016) in studies of its role in ABA signaling in stomata.  
99 In our studies of the three *wrky1* T-DNA mutant alleles, WRKY1 gene expression was altered  
100 from below the level of detection in *wrky1-1*, to 2% and 24% of WT WRKY1 expression levels  
101 in *wrky1-2* and *wrky1-3*, respectively (Supplemental Figures 2, 9-11 ).

102 To determine the effect of the *wrky1* T-DNA mutations on gene expression, *wrky1* plants  
103 were grown under “steady state” conditions, or in response to transient light and/or nitrogen  
104 treatments. For the “steady state” experiments, the three *wrky1* T-DNA alleles and Col-0 were  
105 grown on basal MS media under 16h/8h light/dark regime for 14 days. Shoot tissue was  
106 extracted for mRNA analysis by RT-qPCR and microarray analysis was performed with  
107 Affymetrix ATH1 array to identify genes mis-regulated in the *wrky1* mutants using Rank  
108 Product (Breitling *et al.* 2004) statistical analysis (See Methods). The “core set” of WRKY1  
109 regulated genes were defined as those that are mis-regulated in the most severe knock-down  
110 mutant, *wrky1-1*, and either in *wrky1-2* or *wrky1-3*. This analysis identified 256 genes that are  
111 up-regulated and 117 genes that are down-regulated in the *wrky1* mutants (Supplemental Table  
112 2) (Figure 1A). The 117 genes down-regulated in the *wrky1* mutants (i.e. genes induced by  
113 WRKY1) include a significant over-representation ( $pval < 0.01$ ) of genes enriched in GO-terms  
114 (BioMaps function in VirtualPlant 1.3; Katari *et al.*, 2010) involved in secondary metabolic  
115 processes such as defense response and response to stress (Figure 1A). This role of WRKY  
116 transcription factors in the stress response has been reported for several members of the WRKY  
117 family of TFs (Qiao et al., 2016; Agarwal *et al.*, 2011; Rushton *et al.*, 2010; Chen *et al.*, 2012).  
118 By contrast, the 256 genes up-regulated in the *wrky1* mutants (i.e. genes repressed by WRKY1)  
119 were significantly enriched for GO-terms involved in primary metabolic processes  
120 ( $pval=0.0001$ ), response to carbohydrate stimulus ( $pval=2.3e-05$ ), regulation of nitrogen  
121 compound metabolic process ( $pval=4.9e-05$ ), and response to light stimulus ( $pval=0.0003$ )  
122 (Figure 1A). This result reveals new regulatory roles for WRKY1 as a transcriptional repressor  
123 involved in N and C-metabolism and light signaling.



124 To identify the regulatory elements in the WRKY1 target genes, we performed a search  
125 for known cis-regulatory elements (CREs) in the putative promoter regions (2kb 5' upstream of  
126 TSS sequences) of the genes mis-regulated in the *wrky1* mutants. We found a statistical over-  
127 representation of the W-box promoter motif (e-value = 5.17e-05) among the 117 genes down-  
128 regulated in the *wrky1* mutants. Although the W-box motif was present in nearly all of the genes  
129 up-regulated in the *wrky1* mutants (on average 2.18 W-box elements per promoter), it was not  
130 statistically over-represented. Instead, the I-box (e-value = 1.15e-72), GATA (e-value = 1.23e-  
131 46), ABRE-like (e-value = 3.27e-28), and G-box (e-value = 2.06e-22) motifs were the most  
132 statistically over-represented among the 256 up-regulated genes. The de-repression of these  
133 genes in the *wrky1* mutants could be due to an increase in factors that bind these other motifs. It  
134 is possible that these genes are either indirect targets of WRKY1 or that WRKY1 is part of a TF-  
135 complex that represses their expression in the wild type. Interestingly, a search for all known  
136 protein-protein interactions involving WRKY1, using the Arabidopsis Interactions Viewer  
137 (Geisler-Lee et al., 2007), revealed a single interaction (PSICQUIC confirmed by affinity  
138 chromatography) with General Regulatory Factor 1 (GRF1, AT4G09000), which is a G-box  
139 factor whose native form is as a hetero-dimer. So one hypothesis is that in the WT, WRKY1  
140 interacts with GRF1 as a heterodimer to down-regulate the expression of these genes.

141 Investigation of the core genes involved in the N assimilation pathway revealed that  
142 down-regulation of WRKY1 expression affected the expression of genes involved in both  
143 nitrogen uptake and organic-N metabolism and catabolism. In WT plants, the expression of  
144 genes encoding several nitrate transporters as well as genes directly involved in glutamine  
145 biosynthesis are up-regulated, while genes involved in glutamine catabolism, such as ASN1  
146 (asparagine synthetase1/DARK INDUCIBLE 6), are down-regulated during the light period.  
147 However, in *wrky1* mutant plants, the nitrate transporters NRT1.7 and NRT3.1 and the glutamate  
148 receptor GLR1.1 are down-regulated while ASN1 is up-regulated in the light. Thus, these  
149 transcriptome results provide support for the predicted edge between WRKY1 and ASN1 from  
150 the network analysis described above (Supplemental Figure 1). The observed overall  
151 reprogramming of the nitrogen network also indicates that WRKY1 is likely a regulatory  
152 molecule for this pathway.

153 The involvement of WRKY1 in mediating temporal responses to Light (L) and Nitrogen  
154 (N) signals was further investigated by intersecting the list of *wrky1* mis-regulated genes with

155 lists of genes previously identified as responsive to N-treatments (Gutierrez *et al.*, 2008) or L-  
156 treatments (Nozue *et al.*, 2013) (Figure 1B). Genes normally repressed by WRKY1 in WT (i.e.  
157 the 256 genes up-regulated in the *wrky1* mutants) share a significant overlap with genes  
158 repressed by L-treatments (pval <0.001) (Figure 1B). By contrast, genes induced by WRKY1 in  
159 WT (i.e. the 117 genes down-regulated in the *wrky1* mutant) share a significant overlap with  
160 genes induced by L-treatments (pval <0.001) (Figure 1B). With regard to a potential role for  
161 WRKY1 in N-signaling, genes normally repressed by WRKY1 in WT (i.e. induced in the *wrky1*  
162 mutant) are induced by N-treatments (pval <0.001), while genes induced by WRKY1 (i.e.  
163 repressed in the *wrky1* mutants) are either repressed or induced by N-treatments (pval <0.001)  
164 (Figure 1B).

165 These reciprocal patterns of expression of genes regulated by WRKY1 in L and N  
166 treatment datasets introduce the hypothesis that WRKY1 is an integrator of L and N signaling  
167 pathways. This hypothesis is supported by the finding that WRKY1 expression is independently  
168 and reciprocally regulated by L and N treatments. Specifically, WRKY1 expression is induced  
169 by L-treatment, and repressed by N-treatment (Figure 1C). To further investigate the regulatory  
170 role of WRKY1 in N or L signaling, and the possible crosstalk, we exposed WT and *wrky1*  
171 mutants to three treatments: i) L treatment; ii) N treatment; and iii) combined N and L  
172 treatments, as described below (Table I). Three separate treatments were performed, as opposed  
173 to a single combined treatment, to eliminate omitted-variable bias and accurately determine the  
174 role of WRKY1 in the independent L and N signaling pathways and in regulating crosstalk  
175 between pathways, since transcriptional changes in response to double abiotic stress treatments  
176 are not predictable from responses to single stress treatments (Rasmussen *et al.*, 2013; Prasch  
177 and Sonnewald 2013).

178

### 179 ***WRKY1 mediates the light-repression of genes involved in organic resource catabolism***

180 The finding that WRKY1 regulates genes implicated in light and nitrogen signaling (e.g. ASN1),  
181 inspired us to further examine the role of WRKY1 in the regulation of genes involved in the L  
182 response. This was investigated by comparing light-regulated gene expression in the null *wrky1*-  
183 *I* mutant, compared to WT Col-0 (Figure 2). For this experiment, seedlings were grown on MS  
184 media for 13 DAP and either maintained in normal light/dark cycle, or moved to extended  
185 darkness for 24 h prior to harvest. Two-way ANOVA of transcriptome data followed by FDR

186 correction (pval<0.01 for the ANOVA model) identified 1,110 genes with a significant Light x  
187 Genotype interaction term (pval<0.01 for the coefficient of the term). Intersection of the 1,110  
188 genes regulated by a LxG interaction with the 373 genes mis-regulated by knock-down of  
189 WRKY1 under “steady state” L-conditions (Figure 1), revealed a 35% overlap at a high-level of  
190 significance (pval<0.001). The large number of affected genes and highly significant overlap  
191 with genes mis-regulated in the *wrky1* mutant at steady-state conditions suggest a strong  
192 involvement of WRKY1 in L-signaling.

193 To identify patterns of genes mis-regulated by light in the *wrky1* mutant, we performed  
194 cluster analysis of the microarray data. Specifically, Gene Expression Cluster analysis (Multiple  
195 Expression Viewer (MEV), QTC cluster analysis) and TukeyHSD analysis were performed on  
196 the genes with significant Light x Genotype interaction. Cluster analysis of the genes mis-  
197 regulated in response to a GxL interaction resulted in 11 distinct gene expression clusters (Figure  
198 2; Supplemental Figure 3A). Cluster 1 is the largest (612 genes), which is a set of genes that have  
199 partially lost light-repression in the *wrky1* mutant (Figure 2A). For this set of genes, expression  
200 is normally repressed by L in the WT, but they are up-regulated in the *wrky1-1* mutant (Figure  
201 2A). Genes in Cluster 1 include the dark-inducible genes DIN1, DIN4, DIN6/ASN1, and DIN10  
202 (Fujiki *et al.*, 2001). The intersection of Cluster 1 genes with previously identified light-induced  
203 or light-repressed genes (Nozue *et al.*, 2013) revealed a significant overlap with the light-  
204 repressed genes (pval<0.001) (50 genes). Cluster 1 genes comprise GO-term enrichments  
205 (BioMaps) for organic acid and carboxylic acid catabolic processes (pval<0.01) (Figure 2B).  
206 This observation suggests that WRKY1 plays a large regulatory role in the light-repression of  
207 genes involved in catabolism of organic resources, which are specifically required in plants  
208 exposed to extended darkness. Two other highly significantly overrepresented GO-terms are for  
209 “response to abscisic acid stimulus” (p-value = 0.01) and “regulation of abscisic acid mediated  
210 signaling pathway” (p-value = 0.07). These responses are consistent with recent studies that  
211 showed a role for WRKY1 in ABA signaling in response to drought (Qiao *et al.*, 2016).

212 Unique and significant GO-term enrichments (BioMaps) were also uncovered for the  
213 other clusters of genes regulated by a Light x Genotype interaction in the *wrky1* mutants (Figure  
214 2; Supplemental Figure 3B). These include N-compound metabolic processes (Cluster 2),  
215 disaccharide biosynthetic processes (Cluster 4), generation of precursor metabolites and energy

216 (Cluster 5), ATP biosynthetic process (Cluster 10), and carbohydrate metabolic process (Cluster  
217 11).

218 Finally, TukeyHSD analysis of the Light x Genotype interaction term, revealed a larger  
219 Genotype effect in the Light (901 genes) than in the Dark (499 genes) (Tukey  $p$ val<0.01), while  
220 the Light effect was 89% similar between WT and the mutant. These results suggest a significant  
221 role for WRKY1 in the regulation of light responsive genes (Figure 2, Supplemental Figure 12).

222 To summarize, in the light, WRKY1 specifically: i) *represses* a network of genes that are  
223 required to catabolize cellular resources when light (i.e. in the form of carbon) is limited (Cluster  
224 1), and ii) *activates* a subset of genes involved in the biosynthesis of energy-dependent  
225 metabolites synthesized during the day (Clusters 4 and 5) (see summary Figure 7A). By contrast,  
226 in the dark, WRKY1 i) *activates* a subset of genes involved in processes of respiration and the  
227 production of energy metabolites, and ii) *represses* genes involved in energy expensive,  
228 secondary metabolic processes (see summary Figure 7A).

229

### 230 ***WRKY1 mediates transcriptional reprogramming in response to N treatment***

231 The steady-state analysis of the *wrky1* mutant revealed mis-regulation of genes involved in the  
232 N-assimilation pathway. However, to test if WRKY1 is involved in the regulation of plant  
233 responses to N-signaling, it was necessary to explore changes in expression of genes involved in  
234 the N signaling pathway to a transient N treatment in both the most severe *wrky1-1* T-DNA  
235 mutant (SALK\_070989) and WT (Col-0) seedlings. To do this, *wrky1-1* and WT seedlings were  
236 grown on basal MS media supplemented with 1mM  $\text{KNO}_3^-$  for 14 DAP under long day cycle. At  
237 the start of day, seedlings were transferred to either 60mM N (20mM  $\text{KNO}_3^-$  + 20mM  $\text{NH}_4\text{NO}_3$ )  
238 or 20mM KCl (control) for two hours prior to harvest. A two-way ANOVA of genome-wide  
239 transcriptome data followed by FDR correction of the ANOVA model ( $p$ value<0.01) uncovered  
240 123 genes with a significant Nitrogen x Genotype interaction term ( $p$ value<0.02). Of these 123  
241 genes, 11 had a significant overlap ( $p$ val<0.05) with N-regulated genes in a N-regulatory  
242 network previously identified by Gutierrez *et al.* (2008), including nitrate reductase 1 (NIA1).  
243 This result indicates that a different network of genes responds to transient N treatment when  
244 WRKY1 is absent than when it is present.

245 To better understand the biological role of the 123 genes whose expression is regulated  
246 by WRKY1 and show a significant NxG interaction, Gene Expression Cluster analysis (QTC

247 function in MEV) and TukeyHSD analysis was performed. First, cluster analysis resulted in six  
248 distinct gene expression clusters (Figure 3A), involved in different biological processes (Figure  
249 3B). Clusters 1 and 3 contained genes with the most significant over-representation of GO terms  
250 (BioMaps), in which genes in Cluster 1 are predominantly involved in Cellular Homeostasis  
251 (pval=0.0009), while genes in Cluster 3 are involved in Translation (pval=2.7E-11) and Cellular  
252 protein metabolic process (pval 7.89E-07) (Figure 3B). Further inspection of the gene expression  
253 clusters 2 and 3 revealed that a subset of genes do not respond to N-limitation in the mutant like  
254 they do in plants with WT WRKY1 function. This finding suggests that the role of WRKY1 in  
255 the N-signaling pathway may be as a transcriptional regulator in the control of the N starvation  
256 signaling processes. According to this hypothesis, the subset of genes must meet two criteria: i)  
257 in the *presence* of N, gene expression is the same between the WT and *wrky1-1* mutant; and ii) in  
258 the *absence* of N, gene expression is different between the WT and *wrky1-1* mutant. To identify  
259 a full subset of genes that meet these criteria, we compared TukeyHSD results from the two-way  
260 interaction terms for “N effect in *wrky1-1* mutant plants” and for “Genotype effect in the absence  
261 of N”. This analysis uncovered 38 genes that met our criteria, of which 18% are involved in  
262 carbon compound and carbohydrate metabolism (including O-Glycosyl hydrolases family 17  
263 protein (At5g58090); UDP-Glycosyltransferase superfamily protein (At2g36970);  
264 Phosphofructokinase family protein (At1g20950), and XTH6\_xyloglucan  
265 endotransglucosylase/hydrolase 6 (At5g65730) and others (see Supplemental Table 4). This  
266 result provides further support that WRKY1 is involved in N and energy related signaling  
267 pathways. Additionally, TukeyHSD analysis revealed that the N response was significantly  
268 altered in the *wrky1* mutant for 63 genes (pval<0.01). Of these, 43 genes responded to N in WT  
269 but not in the *wrky1-1* mutant, while 18 genes had a significant N response only in the *wrky1*  
270 mutant seedlings.

271 Cumulatively, these analyses reveal that: i) WRKY1 regulates a different transcriptional  
272 program of genes in response to transient N treatment compared to steady-state N conditions. ii)  
273 Fewer genes are mis-regulated by knock-down of WRKY1 gene expression in response to  
274 transient N treatment compared to steady-state N conditions. iii) N response is altered in *wrky1*  
275 mutants compared to WT, in which WRKY1 represses genes involved in defense response in the  
276 presence of N. However, in the absence of N, WRKY1 activates genes involved in apoptosis  
277 (Cluster 2, Figure 3) and represses genes involved in translation and protein metabolic processes

278 (Cluster 3, Figure 3) that require N (Figure 7B). This last result further supports the hypothesis  
279 that WRKY1 is involved in energy conservation, where under N limiting conditions WRKY1  
280 activates genes involved in recycling of cellular resources while simultaneously suppressing  
281 genes involved in energy expensive protein biosynthesis.

282  
283 ***Combined Light and Nitrogen treatments reveal that WRKY1 regulates crosstalk between L***  
284 ***and N signaling pathways***

285 The above studies collectively support the hypothesis that WRKY1 is a regulatory node in the  
286 Light and Nitrogen response network in Arabidopsis. This implication along with evidence from  
287 previous research (Jonassen *et al.*, 2008; Nunes-Nesi *et al.*, 2010; Obertello *et al.*, 2010; Krouk  
288 *et al.*, 2009) reinforce the notion that transcriptional crosstalk occurs between light and nitrogen  
289 signaling pathways to fine-tune plant energy status. This hypothesis was further investigated by  
290 performing combined treatments with L and N on WT (Col-0) and *wrky1-1* null mutant  
291 (SALK\_070989) seedlings. Here, the aim was to determine if combined L and N treatments will  
292 reveal different transcriptional reprogramming by WRKY1 than is observed in response to  
293 individual L or N treatments, as has been observed for ten Arabidopsis ecotypes in response to  
294 single and double stress treatments (Rasmussen *et al.*, 2013).

295 To test this hypothesis, seedlings were grown on basal MS media supplemented with 1  
296 mM KNO<sub>3</sub><sup>-</sup> under long day light cycle for 13 days. For dark treatment, WT and mutant seedlings  
297 were moved to continuous dark for 24 h prior to N treatment. For N treatment, seedlings were  
298 transferred to basal MS media supplemented with 60 mM N (20 mM KNO<sub>3</sub><sup>-</sup> plus 20 mM  
299 NH<sub>4</sub>NO<sub>3</sub>) at start of light cycle (or putative light cycle for dark treated seedlings) for two hours.  
300 Shoot tissue was extracted for expression analysis by microarrays, while data was analyzed by  
301 three-way ANOVA followed by FDR correction of the ANOVA model (pval<0.01). Three-way  
302 ANOVA revealed significant main effects, two-way interaction effects, and a three-way  
303 interaction effect (Table 2), which identified 724 genes with significant three-way interaction of  
304 Genotype, Light and Nitrogen. Gene network analysis was used to organize these 724 WRKY1-  
305 dependent genes into a network, revealing predicted interactions among nodes based on co-  
306 expression and protein:DNA regulatory interactions (Supplemental Figure 4).

307 To identify groups with similar expression patterns within the 724 genes whose  
308 expression is affected by a Genotype x Light x Nitrogen interaction, cluster analysis was

309 performed (QTC function in MEV) for genes with a significant three-way interaction term  
310 (pval<0.01), which resulted in eight distinct clusters (Figure 4A). GO term analysis (BioMaps)  
311 revealed unique and significant biological functions for genes in clusters 1-6 and 8 (Figure 4B),  
312 including response to light stimulus (Cluster 1, pval=0.04); photosynthesis (Cluster 2, pval 2.7E-  
313 11); embryo development (Cluster 4, pval 3.8E-8); response to nitrate (Cluster 5, pval 0.0003);  
314 and regulation of hormone levels (Cluster 6, pval=0.02). Gene network analysis resulted in a  
315 network in which genes were grouped by significant (pval<0.05) over-representation of shared  
316 biological processes (BinGO Plug-in Cytoscape) (Figure 5). The largest gene clusters had over-  
317 represented GO terms for “metabolic processes” (177 genes); “response to stimulus” (106  
318 genes); and “developmental process” (60 genes) (Figure 5). This analysis provides insight into  
319 the biological processes influenced by the crosstalk between Nitrogen and Light signaling  
320 pathways in which WRKY1 is a regulatory node.

321 To fully interpret the three-way interaction term (LxNxGenotype), genes with significant  
322 three-way interaction were further investigated to statistically determine how the various two-  
323 way interactions differed across the levels of the third variable using a sequential ANOVA  
324 approach (Figure 6). Principle component analysis (PCA) of all single and combined treatments  
325 revealed that light was the dominant effect (PC1), accounting for 49% of the variance, while N  
326 corresponded to PC2, explaining 30% of the total variance (Supplemental Figure 5). Therefore,  
327 the first iteration of sequential ANOVA was performed across levels of the Light variable, and  
328 the second iteration across levels of the Nitrogen variable. Two-way ANOVAs of genes with  
329 significant three-way interaction term under each light condition revealed significant NxG  
330 interaction exclusively in the DARK for 78% of genes (pval<0.05); exclusively in the LIGHT for  
331 12% of genes; and in both DARK and LIGHT conditions for 10% of genes (Figure 6).

332 These results indicate that the interaction between Genotype and N are most significant in  
333 DARK conditions, which was also observed visually from the cluster analysis (Figure 4). Genes  
334 with significant NxG interaction in the DARK were uniquely and significantly enriched in GO  
335 terms (BioMaps) for photosynthesis (pval=0.002), response to light stimulus (pval=0.004), and  
336 glutamine metabolic process (pval=0.05). Alternatively, genes with significant NxG interaction  
337 exclusively in the LIGHT (12% of genes with significant three-way interaction) were uniquely  
338 enriched in GO terms for lignin metabolic process (pval=0.02). Genes with significant two-way

339 interaction term ( $pval < 0.05$ ) in both LIGHT and DARK conditions were enriched in GO terms  
340 for mRNA catabolic process ( $pval = 0.04$ ) and intracellular transport ( $pval = 0.04$ ).

341 To better understand the two-way NxG interaction term, the next step in the sequential  
342 ANOVA analysis was to perform one-way ANOVAs under each N condition while holding the  
343 light variable as either “DARK” or “LIGHT”. Here, we focus on one-way ANOVA results in  
344 DARK conditions since it was revealed as the dominant effect from the previous step. A  
345 comparison of one-way ANOVA models of genes with significant two-way interaction term in  
346 the dark revealed that there was a significant Genotype effect for 16% of genes exclusively in the  
347 *presence* of N, 47% of the genes exclusively in the *absence* of N, and 37% of genes in both  
348 presence and absence of N.

349 The genes with significant Genotype effect in the DARK exclusively in the *presence* of N  
350 have significant enrichment of GO terms for S-glycoside catabolic process ( $pval = 0.04$ ) and  
351 carbohydrate catabolic process ( $pval = 0.05$ ), where in response to transient N treatment, WRKY1  
352 activates a network of genes involved in the remobilization of cellular carbon resources and  
353 represses genes involved in biogenesis (Figure 7C; Supplemental Figure 6). However, genes with  
354 significant Genotype effect in the DARK exclusively in the *absence* of N are uniquely enriched  
355 in GO terms for light stimulus ( $pval = 0.0004$ ); photosynthesis ( $pval = 0.0016$ ); and amine  
356 metabolic processes ( $pval = 0.0088$ ), in which WRKY1 activates genes involved in metabolic and  
357 biosynthetic processes for production of glutamine, tryptophan and chorismate, and represses  
358 genes that respond to light stimulus (Figure 7C). Additionally, genes with significant Genotype  
359 effect ( $pval < 0.05$ ) under both N regimes are enriched in GO terms for chlorophyll biosynthetic  
360 process ( $pval = 0.004$ ); reproductive process ( $pval = 0.006$ ); and embryo development ending in  
361 seed dormancy ( $pval = 0.02$ ).

362 These results indicate that the Genotype effect is weakest in the presence of N. This  
363 finding supports our earlier hypothesis that a less significant Genotype effect is observed  
364 between WT and *wrky1* mutants when N is present. Ultimately, the sequential ANOVA analysis  
365 can be interpreted that the Genotype effect caused by mutation of WRKY1 is revealed most  
366 significantly in the DARK and in the *absence* of N (Figure 7C; Supplemental Figure 6). This  
367 finding suggests a mechanism by which WRKY1 regulates a transcriptional program of genes in  
368 response to C and N limitation. Moreover, analysis of the three-way interaction term provides  
369 support that WRKY1 is a regulatory node connecting Nitrogen and Light signaling pathways. In



370 this model of transcriptional regulation, WRKY1 modulates the expression of a new network of  
371 genes in response to simultaneous N and L signals compared to the transcriptional programs  
372 controlled by WRKY1 in response to either N or L signaling alone (Figure 7 A-D).

373

### 374 ***Phenotypic analysis reveals the regulatory role of WRKY1 in nitrogen metabolism***

375 Our transcriptional and bioinformatics analysis suggests a role for WRKY1 in the regulation of L  
376 and N signaling. To investigate the physiological effect of the *wrky1-1* mutation on plants, *wrky1-1*  
377 mutant and WT lines were grown on soil under low (0 mM N supplement) and high (50 mM N  
378 supplement) nitrogen fertilization regimes and subject to 14 days of growth on normal long-day  
379 light cycle. Plants grown for 14 days were then harvested for elemental analysis to assess total C  
380 and N. Total N analysis revealed a N x genotype effect (Figure 8A) in which there was more  
381 total N in the WT compared to the *wrky1-1* mutant only under low N conditions (p-value =  
382 0.114) compared to high N conditions (p-value = 0.841). Likewise, there was a N x genotype  
383 effect for total C content (Figure 8B) where there was higher C content in the WT compared to  
384 the *wrky1-1* mutant under low N conditions (p-value = 0.102), and there was similar C content  
385 between WT and *wrky1-1* mutant under high N content (p-value = 0.785).

386 We further investigated the underlying metabolism by analyzing free amino acids and  
387 carbohydrates using GC-MS in an attempt to determine the underlying cause for the change in  
388 total N and C content in mutant compared to WT plants. Plants were grown for two weeks on  
389 MS media supplemented with either 0.5 mM  $\text{KNO}_3^-$  or 10 mM  $\text{KNO}_3^-$  then harvested. The  
390 majority of free amino acids were not significantly different between WT and mutant plants  
391 (Supplemental Figure 8). However, there was a higher concentration of glutamine in *wrky1-1*  
392 mutants under both low (p-value = 0.33) and high  $[\text{NO}_3^-]$  (p-value = 0.50) compared to the WT,  
393 and there was a slightly higher accumulation of aspartate in WT than mutant under low  $[\text{NO}_3^-]$   
394 (p-value = 0.15) (Figure 9A-B). Upon examining carbohydrates, the *wrky1-1* mutant had higher  
395 concentrations of sucrose (Figure 9C) and its products glucose and fructose under both low (p-  
396 value = 0.36) and high (p-value = 0.16)  $\text{NO}_3^-$  conditions. However, WT plants had higher  
397 concentrations of the dicarboxylic acid malate only under low  $\text{NO}_3^-$  conditions (Figure 9D) (p-  
398 value = 0.06). These reciprocal patterns of glutamine/aspartate and sucrose/malate suggest a  
399 reprogramming of central C and N metabolism in *wrky1* mutant plants that result in lower overall  
400 C and N content when N is limiting. The WT function of WRKY1 may be to regulate genes

401 involved in the redirection of flux through the TCA cycle away from glutamine biosynthesis and  
402 toward malate/asp synthesis under N-limiting conditions as part of a resource conservation  
403 mechanism.

404

## 405 **DISCUSSION**

### 406 *WRKY1 regulates different transcriptional programs depending on the signal or combination* 407 *of signals perceived*

408 Our data on the *wrky1* T-DNA mutants reveal a defect in genome-wide expression that is  
409 dependent on light (L), nitrogen (N) and a combination of LxN. This suggests that WRKY1  
410 mediates crosstalk between L and N signaling. Vert and Chory (2011) established two criteria for  
411 crosstalk to exist between two signaling pathways: i) “the combinatorial signal from both  
412 pathways should produce a different response than that triggered by each pathway alone”, and ii)  
413 “the two pathways must be connected directly or indirectly.” PCA analysis of the *wrky1* mutant  
414 revealed that light is the dominant effect among single and combined treatments (Supplemental  
415 Figure 4). However, to explain variance in gene expression, the ANOVA analyses revealed that  
416 a different transcriptional program is activated in response to concurrent N and L treatments in  
417 *wrky1* mutant and WT seedlings, compared to transcriptional response to individual N and L  
418 treatments. In addition, approximately 80% of the 724 WRKY1 regulated genes shared between  
419 the L and N pathways (those with significant three-way interaction term) are unique to the  
420 combined L and N treatment compared to individual treatments, indicating a direct connection  
421 between these pathways.

422 Our results for WRKY1 are similar to those reported by a recent study that revealed that  
423 61% of transcriptional changes in ten Arabidopsis ecotypes in response to double abiotic stress  
424 treatments were not predictable from responses to single stress treatments (Rasmussen *et al.*,  
425 2013). Therefore, it is reasonable to suggest that WRKY1 is a regulator of crosstalk between L  
426 and N signaling pathways. Moreover, the resulting crosstalk network contains 29 transcription  
427 factors (Supplemental Table 3), of which 15 have significant ( $pval=5.37e-10$ ) overrepresentation  
428 of the GO term “regulation of nitrogen compound metabolic process,” further indicating a direct  
429 connection between N and L signaling pathways. The sequential ANOVA performed here was  
430 able to effectively deconstruct the three-way interaction term to reveal dominant effects among

431 the interaction to define the plant status under which WRKY1 mediates crosstalk between N and  
432 L signaling pathways.

433 Our analysis revealed a potential mechanism by which WRKY1 functions to repress  
434 genes involved in plant response to light stimulus and activate genes involved in amine  
435 metabolic processes when both light and exogenous N are limiting (Figure 7C). This example  
436 may be extrapolated as a mechanism by which plant transcription factors influence the  
437 partitioning of cellular resources in response to complex environmental signals. The intensive  
438 statistical analysis presented here can be used to decipher multifaceted interactions arising from  
439 similar or even more complex combinatorial experiments.

440

441 ***WRKY1 is likely involved in an energy conservation mechanism in response to low energy***  
442 ***signaling***

443 ANOVA revealed that the majority of the 724 genes mis-regulated in the *wrky1-1 null* mutant  
444 had significant GxN interaction in the dark compared to the light. This result in combination with  
445 GO term analysis generates the hypothesis that WRKY1 is part of an energy conservation  
446 mechanism by which targets of WRKY1 remobilize C resources in the dark when N is abundant,  
447 but up-regulates N metabolism in the dark when N is limiting. In this mechanism, WRKY1  
448 integrates information about cellular N and energy resources to trigger processes necessary for  
449 plant metabolism in response to a transient N-signal. For example, when both light (i.e. carbon)  
450 and nitrogen resources are limiting, genes involved in light response and photosynthesis were  
451 significantly up-regulated in the *wrky1* mutant. By contrast, genes involved in glutamine and  
452 tryptophan metabolic and biosynthetic processes were significantly down-regulated in the *wrky1*  
453 mutant under limiting conditions of light and nitrogen (Figure 7C). These results are supported  
454 by research by Urbanczyk-Wochniak and Fernie (2005), who uncovered the surprising result that  
455 several amino acid pools, including arginine, asparagine, and glutamate, are higher under N-  
456 deficient conditions compared to N-saturated conditions. Specifically, the authors discovered that  
457 N-deficient plants in low light conditions have increased carbohydrate content, and that  
458 glutamate and tryptophan metabolite pools increase initially in response to N-deficiency in both  
459 high and low light conditions. Our model of WRKY1 mediated regulation of genes in the dark  
460 provides transcriptional support for the observed changes in metabolite pools in response to N-  
461 deficiency in low light conditions (Urbanczyk-Wochniak and Fernie, 2005). In our own

462 experiments, we observed that under normal light conditions but with N-limitation, there is a  
463 decrease in total N and C content in the *wrky1* mutant, but a higher concentration of glutamine  
464 and lower concentration of malate and aspartate compared to the WT (Figure 9 B and D). This  
465 analysis of free metabolite pools suggest that the *wrky1* mutant fails to redirect metabolism  
466 toward aspartate biosynthesis and instead maintains glutamine biosynthesis even when C and N  
467 resources are limiting. In future studies, it would be interesting to examine the amino acid  
468 content in proteins (protein-bound aas) to enhance our understanding of the underlying  
469 metabolism that contributes to the altered total C and N contents in mutant plants.

470 Our proposed energy conservation mechanism regulated by WRKY1 is also apparent in  
471 the regulation of a suite of dark inducible genes (DIN1, DIN4, DIN6/ASN1, and DIN10), in  
472 which WRKY1 represses these genes in the light. *AtDIN6/ASN1* in particular has been  
473 associated with both C and N signaling networks and energy conservation mechanisms in  
474 response to abiotic stress (Baena-Gonzales *et al.*, 2007; Lam *et al.*, 1998). The influence of  
475 WRKY1 on ASN1 under light and nitrogen stress is similar to the “low energy syndrome” (LES)  
476 described by (Tome *et al.*, 2014 and Baena-Gonzalez and Sheen, 2008). The LES syndrome  
477 which plays a role in plant adaptation to stressful conditions in which non-specific stresses cause  
478 common energy deprivation responses. LES causes substantial perturbation of cellular processes  
479 including the arrest of metabolism and sugar storage and induction of catabolism, photosynthesis  
480 and remobilization of sugar (Tome *et al.*, 2014; Baena-Gonzalez *et al.*, 2008). *AtKIN10*, an  
481 SNF1-related protein kinase, has been implicated as a factor controlling LES (Baena-Gonzalez *et*  
482 *al* 2007). Comparison of genes up and down regulated by *AtKIN10* (Baena-Gonzalez *et al* 2007)  
483 with genes up and down regulated in *wrky1* mutant plants revealed a unique and highly  
484 significant overlap ( $pval < 0.001$ ) between 81 genes up-regulated by *AtKIN10* and genes down-  
485 regulated by *WRKY1* (Supplemental Figure 7). GO term analysis of the 81 overlapping genes  
486 found a significant over-representation for the term “trehalose metabolic/biosynthetic processes”  
487 ( $pval = 0.009$ ). This is of particular interest since an association between trehalose metabolism and  
488 sugar-sensing in plants has recently been shown (Tsai and Gazzarrini, 2014), in which it is  
489 hypothesized that trehalose acts as a signal of sucrose availability (Schluepmann *et al.*, 2003),  
490 and is shown to inhibit activity of the *AtSnRK1-KIN10* complex. Together, these results suggest  
491 that WRKY1 may play a role in mediating the LES syndrome in plants, having a potentially  
492 inverse but complementary role to the SnRK family of protein kinases. Although there were no

493 observable differences in free Asn levels in two-week old mutant and WT plants, it is likely that  
494 there are differences in either protein-bound Asn levels or in free Asn levels but at a later stage  
495 since Asn is a known storage form of N (Lea et al., 2007; Gaufichon et al., 2016).

496

## 497 **CONCLUSION**

498 The WRKY superfamily of transcription factors exist uniquely in plants, and are primarily  
499 associated with biotic and abiotic stress response (Rushton *et al.*, 2010; Chen *et al.*, 2013; Jia et  
500 al 2015). Our previous network analysis predicted that WRKY1 is a regulatory hub in the  
501 Arabidopsis N assimilation pathway, a component of primary metabolism. Here, we found that  
502 down-regulation of this single TF in a *wrky1-1* null mutant resulted in genome-wide  
503 transcriptional reprogramming of genes regulated by N and L signaling pathways, two essential  
504 plant response pathways. The phenotype of the *wrky1* mutant shows that it plays a non-  
505 functionally redundant role compared to WRKY family members. Our assays show that *wrky1*  
506 mutants are affected in key metabolites of N-assimilation, including glutamine, aspartate, and  
507 glycine. Our results for carbon limitation suggest WRKY1 is involved in the low energy  
508 response pathways in Arabidopsis, and possibly other plant species. We speculate that WRKY1  
509 is likely involved in mediating other abiotic stress response, as was recently shown by Qiao et al.  
510 (2016). Further study is required to investigate the full range of influence of WRKY1 on  
511 transcriptional regulation and resulting physiological phenotypes in response to environmental  
512 signals.

513

## 514 **MATERIALS AND METHODS**

### 515 **Plant Material and Growth Conditions**

516 *Arabidopsis thaliana* wild type (ecotype Columbia Col-0) seeds were obtained from Lehle  
517 Seeds, while *wrky1* T-DNA insertion lines were obtained from ABRC. Homozygous mutants  
518 were identified by PCR genotyping, using gene specific primers in combination with the T-DNA  
519 specific primer Lb1.3 (Supplemental Table 7). The lines SALK\_016954 and SALK\_136009  
520 have a single polymorphism in the WRKY1 gene in the intron and promoter, respectively.  
521 However, the SALK\_070989 line we used was recently shown by SALKSEQ to contain multiple  
522 polymorphisms. SALKSEQ\_070989.0 and SALK\_070989.56.00.x are T-DNA insertions in the  
523 intron sequence of *wrky1*, and both are present in our SALK\_070989 line (Supplemental Figure

524 9). SALKSEQ\_070989.1 is a T-DNA insertion in exon sequence of AT3G20460, a major  
525 facilitator superfamily protein. This insertion was not present in our SALK\_070989 line  
526 (Supplemental Figure 9C), and the gene was not expressed based on microarray analysis.  
527 SALKSEQ\_070989.2 is a T-DNA insertion in the intron of AT4G20300, serine/threonine-  
528 kinase, putative. This insertion was present in our SALK\_070989 line (Supplemental Figure 9D).  
529 However, the expression of this gene only had a 1.2 fold change in expression compared to the  
530 WT and was not determined to be statistically significantly different between the WT and mutant  
531 line (Supplemental Table 2).

532 For steady-state or no-treatment experiments, wild type (Col-0) and homozygous mutant  
533 (SALK\_070989; SALK\_016954; SALK\_136009) seeds were vapor-phase sterilized, vernalized  
534 for 3 days, then grown on basal MS media (Sigma M5524-1L), with 0.5 g/l MES hydrate  
535 (Sigma-Aldrich), 0.1% [w/v] sucrose, 1% [w/v] agar at pH 5.7. Plants were grown vertically on  
536 plates for 14 days in an Intellus environment controller (Percival Scientific, Perry, IA), under  
537 long-day (16 h light/8 h dark) conditions with light intensity of 50  $\mu\text{mol m}^{-2}\text{s}^{-1}$  at constant temp  
538 of 22°C. Seedlings were harvested two hours after start of light period and flash frozen in liquid  
539 N. For light treatments, Col-0 and SALK\_070989 seedlings were grown exactly the same as no-  
540 treatment seedlings; however, at 13 DAP at start of the light period, half of the seedling plates  
541 were wrapped in a double layer of foil to extend darkness then placed back in the same chamber.  
542 On 14 DAP, seedlings were harvested two hours after start of the light period or putative start of  
543 light period for dark treated seedlings and immediately placed in liquid N. Dark treated seedlings  
544 were harvested at the same time as long day seedlings, but in complete darkness and flash frozen  
545 in liquid N. For nitrogen treatments, Col-0 and SALK\_070989 seedlings were grown on basal  
546 MS media without N (custom GIBCO), supplemented with 1 mM  $\text{KNO}_3^-$ , 0.5 g/l MES hydrate  
547 (Sigma-Aldrich), 0.1% [w/v] sucrose, 1% [w/v] agar at pH 5.7. Seedlings were grown under the  
548 same conditions as the no-treatment seedlings for 14 days, then at start of the light period WT  
549 and mutant seedlings were transferred to either N-rich media (basal MS media without N  
550 (Phytotech), supplemented with 20 mM  $\text{NH}_4\text{NO}_3$  plus 20 mM  $\text{KNO}_3^-$ , 0.5 g/l MES hydrate  
551 (Sigma-Aldrich), 0.1% [w/v] sucrose, 1% [w/v] agar at pH 5.7) or control media (basal MS  
552 media without N (Phytotech), supplemented with 20 mM KCl (molar equivalent for K in  $\text{KNO}_3^-$   
553 ), 0.5 g/l MES hydrate (Sigma-Aldrich), 0.1% [w/v] sucrose, 1% [w/v] agar at pH 5.7) for two  
554 hours then harvested and flash frozen in liquid N. For combined light and nitrogen treatments,

555 half of the seedlings received extended dark treatment on 13 DAP as done for the light  
556 treatments, while the other half remained under normal light/dark regime. Nitrogen treatments  
557 were performed as before on 14 DAP in both light and dark conditions at start of light period.  
558 For all treatments, shoots and roots were harvested separately, and subsequent analyses were  
559 performed on shoot tissue only.

560

### 561 **RNA isolation, RT-qPCR, and Microarray**

562 RNA from 3 biological replicates from each experiment was extracted from shoots using an  
563 RNeasy Mini Kit with RNase-free DNaseI Set (QIAGEN) and quantified on both a Nanodrop  
564 1000 spectrophotometer (Thermo Scientific) and a Bioanalyzer RNA Nano Chip (Agilent  
565 Technologies). RNA was converted to cDNA (Thermoscript kit, Invitrogen) then analyzed by  
566 RT-qPCR using LightCycle FastStart DNA MasterPLUS SYBR Green I kit (Roche) with a  
567 LightCycler 480 (Roche, Mannheim, Germany). RT-qPCR primers are listed in Supplemental  
568 Table 7. Then, a 100 ng aliquot of total RNA was converted into cDNA, amplified and labeled  
569 with GeneChip 3' IVT Express Kit Assay (Affymetrix). The labeled cDNA was hybridized,  
570 washed and stained on an ATH1-121501 Arabidopsis Genome Array (Affymetrix) using a  
571 Hybridization Control Kit (Affymetrix), a GeneChip Hybridization, Wash, and Stain Kit  
572 (Affymetrix), a GeneChip Fluidics Station 450 and a GeneChip Scanner (Affymetrix).

573

### 574 **Analysis and clustering of microarray data**

575 Microarray intensities were normalized using the GCRMA  
576 (<http://www.bioconductor.org/packages/2.11/bioc/html/gcrma.html>) package in R (<http://www.r-project.org/>). For the steady-state experiment, differentially expressed genes for each mutant  
578 genotype were determined by Rank-Product (Breitling *et al.*, 2004) and raw p-values were  
579 adjusted by False Discovery Rate (FDR) with a cutoff of 5%. For light-only and nitrogen-only  
580 experiments, differentially expressed genes were determined by two-way ANOVA with  
581 genotype and either light or nitrogen as factors. A gene was identified as differentially expressed  
582 if the FDR corrected p-value of ANOVA models was less than 0.01 and the p-value of the  
583 interaction coefficient, genotype and light or nitrogen (genotype x N or genotype x light), was  
584 less than 0.02. Tukey's honest significant difference test (TukeyHSD) was used for multiple  
585 comparison to identify interaction term means that were significantly different from each other

586 greater than the expected standard error. Only unambiguous probes were included. Multiple  
587 Experiment Viewer software (TIGR; <http://www.tm4.org/mev/>) was used to create heat maps  
588 and perform cluster analysis using Quality Threshold Clustering (QTC) with Pearson  
589 Correlation, HCL: average linkage method, and diameter 0.1. The significance of overlaps of  
590 gene sets were calculated using the GeneSect (R)script (15) using genes that are represented on  
591 the microarray as background. The significance of overrepresented Gene Ontology (GO) term  
592 analysis was performed with BioMaps (VirtualPlant 1.3) (Katari et al, 2010) using genes that are  
593 represented on the microarray as background in which the p-value of over-representation was  
594 measured by Fisher Exact Test with FDR correction and p-value cutoff of 0.01 or as otherwise  
595 indicated in figures. All microarray data have been deposited into GEO  
596 (<http://www.ncbi.nlm.nih.gov/geo>): GSE76278.

597 Three *wrky1* mutant T-DNA insertion lines were used to understand the core regulatory  
598 role of WRKY1 in response to nitrogen and light perturbations (see Plant Material and Growth  
599 Conditions). Microarray analysis was done for all three mutant lines plus wild type for “steady-  
600 state” and individual “light” and “nitrogen” treatments. Probes were normalized using the  
601 GCRMA method. Probes with more than one Present Call (P) in at least one group of replicates  
602 and a standard deviation greater than 0 were kept for further analysis. ANOVA with model  
603 simplification followed by Tukey HSD was performed for these three experiments in R using  
604 reshape2 (Wickham, 2007) and tidyverse (Wickham, 2017) packages and the GCRMA (Wu &  
605 Irizarry; MacDonald & Gentry, 2018), affy (Gautier et al., 2004), and BiocGenerics packages  
606 from Bioconductor. This analysis revealed that the three mutants lines respond in the same way  
607 to light and/or nitrogen perturbations, which is different from the WT response (Supplemental  
608 Figures 12 and 13), meaning that the same genes are either up or down-regulated across mutant  
609 genotypes in response to the treatment. Based on this analysis we were confident presenting  
610 results from the most severe *wrky1* mutant (*wrky1-1*) and WT control plants.

611

### 612 **Sequential ANOVA for combined experiment**

613 For the combined N and light experiment, differentially expressed genes were determined by a  
614 three-way ANOVA with genotype, N, and light as factors. The ANOVA model was adjusted by  
615 FDR at cutoff of 1%, and genes significantly regulated by the interaction of genotype x light x  
616 nitrogen were selected with a p-value (ANOVA after FDR correction) cutoff of 0.01. Genes with



617 significant three-way interaction were subjected to two-way ANOVA in which genotype x N  
618 interactions were explored across levels of the light variable, resulting in “Dark” and “Light”  
619 ANOVA models, similar to ([threewayanova.htm](http://threewayanova.htm). UCLA: Statistical Consulting Group;  
620 from <https://stats.idre.ucla.edu/spss/faq/how-can-i-explain-a-three-way-interaction-in-anova-2/>,  
621 last accessed March 5, 2018). Genes with significant two-way interactions (ANOVA p-value  
622 <0.05 after model FDR correction, cutoff 5%) from Dark and Light ANOVA models were  
623 subjected to one-way ANOVA in which genotype factor was explored across levels of the N  
624 variable, resulting in “Dark Nitrogen”, “Dark Control”, “Light Nitrogen”, and “Light Control”  
625 ANOVA models. Genes with p-value < 0.05 (ANOVA after model FDR correction, cutoff 5%)  
626 were considered to have a significant genotype effect. Heat maps, cluster analysis, GO term  
627 analysis, and gene set overlap analysis were all performed as described above.

628

### 629 **Gene Network Analysis**

630 Analysis of the nitrogen regulatory subnetwork was performed as described in Gutierrez *et al.*,  
631 2008, except that only one regulatory binding site was required for protein:DNA edges. The  
632 nitrogen x light crosstalk network was constructed from the 724 genes with a significant three-  
633 way interaction term for genotype x nitrogen x light. The Arabidopsis multi-network  
634 (VirtualPlant 1.3) was queried with this list of genes, and only significant correlation and  
635 protein:DNA regulatory edges were included in the network using Pearson correlation (cutoffs 1  
636 to 0.7 or -1 to -0.7, with  $P \leq 0.01$ ). Networks were generated using the “Gene Networks” tool in  
637 the VirtualPlant system ([www.virtualplant.org](http://www.virtualplant.org)). Networks are visualized in Cytoscape 3.2.1.

638

### 639 **Promoter Analysis**

640 The 2kb 5’ end upstream of the transcription start site (TSS) were considered the putative  
641 promoters regions of genes of interest. These regions were analyzed for known cis-regulatory  
642 element over-representation within a group of genes using Elefinder  
643 (<http://stan.cropsci.uiuc.edu/cgi-bin/elefinder/compare.cgi>), which returns an Expect value (e-  
644 value) that indicates how likely the result would be returned by chance based on the binomial  
645 distribution.

646

### 647 **Principle Component Analysis**

648 Forty experiments (22 from LxNxG experiment, 12 from LxG experiment, and 6 from steady  
649 state) were re-normalized together using gcrma. The NxG hybridizations are the same as light  
650 treatments in the LxNxG. Normalized expression values were centered and used for principal  
651 component analysis using the prcomp function in R. The summary function in R was used to  
652 obtain the information regarding the % variance explained.

653

### 654 **Elemental Analysis**

655 *Arabidopsis thaliana* lines Col-0 and SALK\_070989 were grown on autoclaved soil (Sunshine  
656 Mix LC1) and fertilized with either ½ MS media minus C and N or ½ MS media supplemented  
657 with 50 mM NH<sub>4</sub>NO<sub>3</sub>. Total C, H, and N were determined by elemental analysis using an Exeter  
658 Analytical CHN Analyzer (Model CE440). Dried samples (30 mg FW, which is approximately  
659 1.5 mg DW) were weighed in consumable tin capsules and purged with helium prior to  
660 combustion in pure oxygen under static conditions. Results were statistically analyzed using two-  
661 way analysis of variance.

662

### 663 **Metabolite Analysis**

664 *Arabidopsis thaliana* lines Col-0 and SALK\_070989 were grown on 50mL of Murashige and  
665 Skoog modified basal-salt mixture (Phytotech Labs M531) containing 1% w/v sucrose and either  
666 0.5mM or 10mM NH<sub>4</sub>NO<sub>3</sub> solution containing 20g/L BD bacto agar in a 100 x 100 x 15mm  
667 square petri dish with grid (Light Labs D210-16), three biological replicates each. Plants were  
668 grown for 14 days in Percival growth chamber (Percival Scientific) under long-day (16h light/8h  
669 dark) conditions with a light intensity of 120 μmolm<sup>-2</sup>s<sup>-1</sup> and at a constant temperature of  
670 22°C. Seedlings were harvested two hours after the start of the light period on the 14th day. The  
671 shoots from each plate were cut off, placed in an Eppendorf tube and flash frozen in liquid  
672 nitrogen. The samples were then stored at -80°C.

673 Metabolites were extracted based on the method outlined by Fiehn et al., 2008. The  
674 extraction solvent was prepared by mixing isopropanol/acetonitrile/water at the volume ratio of  
675 3:3:2. For amino acid analysis, the concentrated samples were fractionated as outlined by Orlova  
676 et al., (2006). 1mL of water was added to each sample and vortexed until the residue was  
677 resuspended. 25μL of 10mM ribitol and 10mM alpha-aminobutyric acid was added as internal  
678 standards.

679 Samples were derivatized as outlined by Fiehn et al., 2008. An Agilent 7890B/7693 GC-  
680 MS system was used with a fused silica capillary column SPB-35 column (30 m x 320  $\mu$ m x 0.25  
681  $\mu$ m; Supelco 24094). 1 $\mu$ L of each sample was injected using a splitless mode at 230°C. Helium  
682 (ultra high purity) was applied as the carrier gas using constant flow mode. The MS transfer line,  
683 ion source and quadrupole were kept at 250°C, 250°C and 150°C respectively. The GC oven  
684 was set to an initial temperature of 80°C and held for 2min. The temperature then increased at a  
685 rate of 5°C/min until a max temperature of 275°C and held for 6min. The MS was set to scan  
686 mode, and set to detect compounds eluting from 50-600m/z.

687 Agilent MassHunter Qualitative Analysis B.07.00 was used to obtain peak areas.  
688 Metabolite peaks were normalized to the internal standard and quantified as nmol/g FW.  
689 Statistical analysis (two-way ANOVA) was performed using R 3.5.2.

690

## 691 **Acknowledgements**

692 The authors gratefully acknowledge Dr. Ying Li and Daniel Tranchina for advising on data  
693 analysis; and Dr. Gabriel Krouk for advice.

694

## 695 **Author contributions**

696 AMC designed the research, performed the research, analyzed data, and wrote the paper. GC  
697 designed the research and wrote the paper. MK analyzed data and wrote the paper. RP assisted  
698 AMC with experiments. SH performed experiments and assisted AMC and MK to analyze data.

699

## 700 **FIGURE LEGENDS**

701 **Figure 1. Down-regulation of *WRKY1* results in mis-regulation of genes involved in light,**  
702 **nitrogen, and stress response pathways. A.** Transcriptome analysis of WT (Col-0) and mutant  
703 *wrky1-1* (SALK\_070989), *wrky1-2* (SALK\_016954) and *wrky1-3* (SALK\_136009) seedlings.  
704 Heat map of transcriptome data includes genes with significant (pval<0.01; FDR 5%) change in  
705 expression from WT in *wrky1-1* and *wrky1-2* or *wrky1-3*. Top significantly (pval<0.01)  
706 overrepresented GO terms are listed. **B.** Significance of overlaps (pval<0.001) of *WRKY1*  
707 regulated, light regulated (Nozue *et al.*, 2013), and nitrogen regulated (Gutierrez *et al.*, 2008)  
708 gene sets were calculated using the GeneSect (R)script using the microarray as background.  
709 Total number of genes are inside parentheses; number of overlapping genes are shown in boxes.

710 Boxes in yellow have  $p$ -value  $<0.001$ , indicating the size of the intersection is higher than  
711 expected. **C.** Relative expression levels of WRKY1 in WT (Col-0) seedlings in response to  
712 nitrogen (control is 20 mM KCl, treatment is 20 mM  $\text{NH}_4\text{NO}_3$  + 20 mM  $\text{KNO}_3^-$ ) and light  
713 treatments (control is normal long day, treatment is extended dark). Error bars are standard error  
714 of the mean; 3 biological replicates.

715

716 **Figure 2. Cluster analysis of WRKY1-dependent genes with significant Genotype x Light**  
717 **interaction reveal loss of light repression for some dark inducible genes. A.** Cluster analysis  
718 of genes with significant ( $p$ -val $<0.02$ , FDR 5%) Genotype x Light interaction effect (1567 genes).  
719 Shaded area indicated dark conditions. Only Cluster 1 is shown, full cluster analysis can be  
720 viewed in Supplemental Figure 3. **B.** GO term analysis of gene cluster 1 with significant GxL  
721 effect.

722

723 **Figure 3. Figure 3. Cluster analysis of genes with significant Nitrogen x Genotype effect**  
724 **reveal that WRKY1 participates in plant response to N-limitation. A.** Cluster analysis of  
725 genes with significant ( $p$ -val $<0.02$ , FDR 5%) Genotype x Nitrogen interaction effect (123 genes).  
726 **B.** GO term analysis of gene clusters with significant GxN effect.

727

728

729 **Figure 4. Combinatorial treatment of *wrky1* mutants and WT with Nitrogen and Light**  
730 **results in a significant three-way GxLxN interaction.** Cluster analysis of genes with  
731 significant ( $p$ -val $<0.01$ , FDR 5%) Genotype x Nitrogen x Light interaction effect (724 genes). **B.**  
732 GO term analysis of gene clusters with significant GxNxL effect. Shaded area indicated dark  
733 conditions. N = Nitrogen treatment; KCl = control treatment; Col = Col-0; *wrky1* = *wrky1-1*.

734

735 **Figure 5. Genes commonly regulated by WRKY1, Nitrogen, and Light comprise a network**  
736 **of diverse biological functions.** Network of statistically overrepresented GO terms in the set of  
737 724 genes with significant G x N x L interaction effect. Node area is proportional to the number  
738 of genes within the functional category (i.e. more genes equals larger node). Colored nodes are  
739 significantly overrepresented (see color legend), while white nodes are not significantly  
740 overrepresented (BinGO, Maere *et al.*, 2005).

741  
742 **Figure 6. Graphical representation of the sequential ANOVA to interpret the three-way**  
743 **interaction term.** These plots represent the general observations for the 724 genes with  
744 significant three-way interaction. This example shows the three scenarios we observed for how  
745 gene expression changes in the light and the dark in response to the nitrogen variable across  
746 levels of the genotype variable. In our study, 78% of the genes only have a significant G x N  
747 interaction in the Dark (A), 12% of the genes only have a significant G x N interaction in the  
748 Light (B), and 10% of the genes have a significant G x N interaction in both Dark and Light  
749 conditions (C). WT = Col-0, Mut = *wrky1-1*.

750  
751 **Figure 7. WRKY1 regulates genes in Light and Nitrogen pathways and is an integrator of**  
752 **Light and Nitrogen signaling.** Putative mechanism by which WRKY1 regulates different  
753 transcriptional programs under three conditions: A. Light treatment; B. Nitrogen treatment; C.  
754 Combined Light and Nitrogen treatment. The most significantly overrepresented GO terms for  
755 biological process are shown. Arrows indicate activation, lines and bars indicate repression.  
756 Percentages are the number of genes from a given group that adhere to the proposed mechanism  
757 in each panel. Shaded areas indicate dark conditions. +N = nitrogen treatment; -N = control  
758 treatment.

759  
760 **Figure 8. Total N and C contents in WT and *wrky1-1* plants.** A. Total nitrogen by percent  
761 weight (mean  $\pm$  SD % by weight) in Col-0 and *wrky1-1* under 0mM and 50mM N supplement.  
762 B. Total carbon by percent weight (mean  $\pm$  SD % by weight) in Col-0 and *wrky1-1* under 0mM  
763 and 50mM N supplement. \* and + indicates statistical significance as determined by two-tailed  
764 T-test:

765 \* = p-value < 0.05, \*\* = p-value < 0.01, \*\*\* = p-value < 0.001.

766  
767 **Figure 9. Measured metabolite levels (mean  $\pm$  SD nmols/mg) in Col-0 and *wrky1-1*.** A.  
768 glutamine; B. aspartate; C. sucrose; and D. malate, under nitrogen treatment of 0.5mM  $\text{KNO}_3^-$   
769 and 10.0mM  $\text{KNO}_3^-$ . \* and + indicates statistical significance as determined by two-tailed T-test:  
770 + = p-value < 0.02, ++ = pvalue < 0.01, \* = p-value < 0.05.

771

772 **Supplemental Figure 1.** *WRKY1* regulatory subnetwork (VirtualPlant 1.1). Green lines indicate  
773 positive correlation and red lines indicate negative correlation of putative TF targets. Arrows  
774 indicate activation and flat lines indicate repression. Black lines indicate metabolic reactions.  
775 Correlation cutoff ( $\geq 0.7$  or  $\leq -0.7$ ) and P-value  $\leq 0.01$ .

776

777 **Supplemental Figure 2.** Relative expression of *WRKY1* in WT (Col-0) and *wrky1* T-DNA  
778 mutants measured by RT-qPCR; *wrky1-2* is SALK\_016954; *wrky1-3* is SALK\_136009; *wrky1-1*  
779 is SALK\_070989. Error bars are standard error of the mean; three biological replicates.

780

781 **Supplemental Figure 3. Full cluster analysis of genes with significant Genotype x Light**  
782 **interaction. A.** Cluster analysis of genes with significant (pval<0.02, FDR 5%) Genotype x  
783 Light interaction effect (1567 genes). **B.** GO term analysis of gene clusters with significant GxL  
784 effect. *wrky1* = *wrky1-1*; shaded areas = dark conditions.

785

786 **Supplemental Figure 4.** Crosstalk network of genes with significant three-way interaction  
787 (GxNxL). Nodes (580) are connected genes (transcription factor = triangle; metabolic = blue  
788 square; protein coding = purple square), edges (3110) are correlation based on co-expression (e-  
789 value cutoff = 0.01; green is negative; red is positive; increasing opacity corresponds to  
790 decreasing level of significance) and binding site over-representation, in which the target gene  
791 has at least one binding site for the transcription factor (Nero *et al.*, 2009).

792

793 **Supplemental Figure 5.** Principal component analysis of all experiments identifies Light as the  
794 first principal component, explaining 49% of the variance, followed by Form of Nitrogen as the  
795 second principal component, explaining 30% of the variance. All experiments are labeled with  
796 L/D for Light or Dark, Col/WF for Wild type or *wrky1-1* Mutant, N/C for Nitrogen or Control,  
797 and finally with the replicate number. Steady state experiments are labeled with an upside down  
798 purple triangle, Light x Genotype experiments are labeled with red triangle, and finally the  
799 experiment with three factors (Light (L), Nitrogen (N), and Genotype (G)) are labeled with a  
800 blue diamond. Nitrogen x Genotype experiments is a subset of this dataset (Light only). It is  
801 clear from this figure that the first principal component is Light where all dark experiments are

802 on the right and Light are on the left. And the second principal component is the form of  
803 Nitrogen treatment – Transient (bottom) and Constant (top).

804

805 **Supplemental Figure 6.** Representative genes of the WRKY1 mechanism in the dark, which are  
806 significant for the Light x Nitrogen x Genotype interaction shown in Figure 7. \* indicates  
807 statistically significant difference at  $p < 0.01$  as determined by sequential ANOVA (see  
808 Materials and Methods). D = Dark; N = Nitrogen treatment; C = KCl treatment; Mut = *wrky1-1*;  
809 WT = Col-0.

810

811 **Supplemental Figure 7.** Significance of overlaps ( $p < 0.001$ , number of overlapping genes  
812 inside parentheses) of *WRKY1* regulated (genes mis-regulated in *wrky1-1* mutant plants) and  
813 *AtKIN10* regulated (Baena-Gonzalez *et al.*, 2007) gene sets, calculated using the GeneSect  
814 (R)script using the microarray as background. *AtKIN10* was overexpressed in protoplasts while  
815 *WRKY1* was down-regulated in whole plants. Therefore, the genes up-regulated by *AtKIN10* are  
816 down-regulated by *WRKY1*. Above the diagonal and in yellow;  $p$ -value  $< 0.05$ , and the size of the  
817 intersection is higher than expected. Below the diagonal and in blue;  $p$ -value  $< 0.05$ , and the size  
818 of the intersection is lower than expected (Katari *et al.*, 2010).

819

820 **Supplemental Figure 8:** Measured metabolite levels (mean  $\pm$  SD nmols/mg) in Col-0 and  
821 *wrky1-1*. **A.** asparagine; **B.** glutamate; **C.** fructose; **D.** glucose; **E.** threonic acid; **F.** serine; **G.**  
822 threonine; and **H.** glycine under nitrogen treatment of 0.5mM  $\text{KNO}_3^-$  and 10.0mM  $\text{KNO}_3^-$   
823 (Tukey's HSD,  $p$ -value  $< 0.05$ ).

824

825 **Supplemental Figure 9: SALK\_070989 genotyping gels.** 2% Agarose gel electrophoresis of  
826 PCR amplified products using the respective PCR primer set for each polymorphism. Lane L is a  
827 1kB DNA size ladder for each image. **A.** SALK\_070989.56.00.X. Lanes 1-7 are products using  
828 the forward and reverse primers, while lanes 8-14 are products using the LBb1.3 and reverse  
829 primers. Lanes 1 and 8 are blank PCR samples. Lanes 2-5 and 9-12 are Col-0 samples. Lanes 6-7  
830 and 13-14 are SALK\_070989 samples. **B.** SALKSEQ\_070989.0 Lanes 1-7 are products using  
831 the forward and reverse primers. Lane 1 is a blank PCR sample. Lanes 2-5 are Col-0 samples.  
832 Lanes 6-7 are SALK\_070989 samples. **C.** SALKSEQ\_070989.0. Lanes 8-14 are products using

833 the LBb1.3 and the reverse primers. Lane 8 is a blank PCR sample. Lanes 9-12 are Col-0  
834 samples. Lanes 13-14 are SALK\_070989 samples. **D.** SALKSEQ\_070989.1. Lanes 1-4 are  
835 products using the forward and reverse primers, while lanes 5-8 are products using the LBb1.3  
836 and reverse primers. Lanes 1 and 5 are blank PCR samples. Lanes 2-3 and 6-7 are Col-0 samples.  
837 Lanes 4 and 8 are SALK\_070989 samples. **E.** SALKSEQ\_070989.2. Lanes 1-7 are products  
838 using the forward and reverse primers, while lanes 8-14 are products using the LBb1.3 and  
839 reverse primers. Lanes 1 and 8 are blank PCR samples. Lanes 2-5 and 9-12 are Col-0 samples.  
840 Lanes 6-7 and 13-14 are SALK\_070989 samples.

841  
842 **Supplemental Figure 10: SALK\_016954 and SALK\_136009 genotyping gels.** 2% Agarose  
843 gel electrophoresis of PCR amplified products. **A.** SALK\_016954. Lanes 1-4 are PCR amplified  
844 products using the forward and reverse primers, while lanes 5-8 are PCR amplified products  
845 using the LBb1.3 and reverse primers. Lanes 1 and 8 are blank PCR samples. Lanes 2 and 6 are  
846 Col-0 samples. Lanes 3-4 and 7-8 are SALK\_016954 samples. Lane L is a 1kb DNA size ladder.  
847 **B.** SALK\_136009. Lanes 1-4 are PCR amplified products using the forward and reverse primers,  
848 while lanes 5-8 are PCR amplified products using the LBb1.3 and reverse primers. Lanes 1 and 8  
849 are blank PCR samples. Lanes 2 and 6 are Col-0 samples. Lanes 3-4 and 7-8 are SALK\_136009  
850 samples. Lane L is a 1kb DNA size ladder.

851  
852 **Supplemental Figure 11:** A. QT clustering of differentially expressed genes under dark  
853 treatment (53% of D.E. genes). B. QT clustering of differentially expressed genes under light  
854 treatment (52% of D.E. genes). **1.** Col-0; **2.** *wrky1-2*; **3.** *wrky1-3*; **4.** *wrky1-1*

855  
856 **Supplemental Figure 12:** A. QT clustering of differentially expressed genes under 20 mM  
857 NH<sub>4</sub>NO<sub>3</sub>, 20 mM KNO<sub>3</sub> (85% of genes). B. QT clustering of differentially expressed genes  
858 under 20 mM KCl (67% of genes).

859  
860  
861 **TABLES**  
862 **Table 1. Experimental design for light only (L), nitrogen only (N), and combined light and**  
863 **nitrogen (LN) treatments.**



| <b>Experiment</b> | <b>Light</b> | <b>Nitrogen</b> |
|-------------------|--------------|-----------------|
| L1                | +            | +               |
| L2                | -            | +               |
| N1                | +            | -               |
| N2                | +            | +               |
| LN1               | -            | -               |
| LN2               | -            | +               |
| LN3               | +            | -               |
| LN4               | +            | +               |

864

865 **Table 2. Results of three-way ANOVA, for individual and interaction terms. Genotype (G),**  
866 **nitrogen (N), light (L). No. Genes is the number of ATH1-genechip identifiers (probes).**

| <b>Effect</b> | <b>No. Genes</b> |
|---------------|------------------|
| <b>G</b>      | <b>2356</b>      |
| <b>N</b>      | <b>5062</b>      |
| <b>L</b>      | <b>10158</b>     |
| <b>GxN</b>    | <b>1022</b>      |
| <b>GxL</b>    | <b>1459</b>      |
| <b>NxL</b>    | <b>2114</b>      |
| <b>GxNxL</b>  | <b>700</b>       |

867

868 **Supplemental Table 1. Putative targets of WRKY1 identified from gene network analysis.**

869 See: Supplemental Tables 1-6.xlsx

870

871 **Supplemental Table 2.** Significantly regulated genes from the steady-state (no treatment)  
872 conditions. Rank product pairwise comparisons between WT (Col-0) and wrky1 mutant lines  
873 (SALK\_016954; SALK\_136009; SALK\_070989); genes have significant change in expression if  
874  $pvalue < 0.01$ , FDR cutoff = 5%.

875 See: Supplemental Tables 1-6.xlsx

876

877 **Supplemental Table 3. BioMaps output for 29 transcription factors in the crosstalk**  
878 **network.**

879

880 **Supplemental Table 4.** Significantly regulated genes from the nitrogen treatment conditions;  
881 Control = 20 mM KCl; Treatment = (20 mM NH<sub>4</sub>NO<sub>3</sub> + 20 mM KNO<sub>3</sub><sup>-</sup>). Two-way ANOVA:  
882 WT (Col-0) and wrky1 mutant (SALK\_070989); genes have significant change in expression if  
883 pvalue<0.02, ANOVA model FDR cutoff = 1%.

884 See: Supplemental Tables 1-6.xlsx

885

886 **Supplemental Table 5.** Significantly regulated genes from the light treatment conditions;  
887 Control = long day conditions; Treatment = extended dark. Two-way ANOVA: WT (Col-0) and  
888 wrky1 mutant (SALK\_070989); genes have significant change in expression if pvalue<0.02,  
889 ANOVA model FDR cutoff = 1%.

890 See: Supplemental Tables 1-6.xlsx

891

892 **Supplemental Table 6.** Significantly regulated genes from the combined nitrogen and light  
893 treatment conditions; Controls = long day conditions; 20 mM KCl; Treatments = extended dark;  
894 (20 mM NH<sub>4</sub>NO<sub>3</sub> + 20 mM KNO<sub>3</sub><sup>-</sup>). Three-way ANOVA: WT (Col-0) and wrky1 mutant  
895 (SALK\_070989); genes have significant change in expression if pvalue<0.01, ANOVA model  
896 FDR cutoff = 1%.

897 See: Supplemental Tables 1-6.xlsx

898

899 **Supplemental Table 7.** Primers used for genotyping germplasms and for RT-qPCR.

| <b>PCR Primers</b>         |                                                                      |
|----------------------------|----------------------------------------------------------------------|
| <u>Germplasm/Insertion</u> | <u>Primer Sequence</u>                                               |
| SALK_070989                | 5'-AAAATCGATCCCCAAAGTTTG-3' (LP)<br>5'-CATCTACTTCCGACTGCGAAG-3' (RP) |
| SALK_016954                | 5'-AAAATCGATCCCCAAAGTTTG-3' (LP)<br>5'-CTAGCCAGAACTTTTCCCACC-3' (RP) |
| SALK_136009                | 5'-CTCTTCATCTCGAAAGCTACG-3' (LP)<br>5'-TCCTATGCTTCACCAACGATC-3' (RP) |

|                               |                                                                                   |
|-------------------------------|-----------------------------------------------------------------------------------|
| SALKSEQ_070989.0              | 5'-TGTATTTGCAAAATCGATCCC-3' (LP)<br>5'-CTAGCCAGAACTTTTCCCACC-3' (RP)              |
| SALKSEQ_070989.1              | 5'-TCTTCAGTTTGATCGTAACC-3' (LP)<br>5'-AGTTGAATGTGTAAGAGACG-3' (RP)                |
| SALKSEQ_070989.2              | 5'-GCTCAGGGTCATCAAGAAGTG-3' (LP)<br>5'-GCTGGTTCTCTGTTGGCATAAC-3' (RP)             |
| SALK_070989.56.00.x           | 5'-AAAATCGATCCCCAAAGTTTG-3' (LP)<br>5'-CATCTACTCCGACTGCGAAG-3' (RP)               |
| <b><u>RT-qPCR Primers</u></b> |                                                                                   |
| <u>Gene</u>                   | <u>Primer Sequence</u>                                                            |
| At2g04880 (WRKY1)             | 5'-CACAATCAAGTAGGATAACGGG-3' (FP);<br>5'-ACAATGCGTGAATCATTGGT-3' (RP)             |
| At4g05320 (UBQ10)             | 5'-GGCCTTGATAATCCCTGATGAATAAG-3' (FP);<br>5'-AAAGAGATAACAGGAACGGAAACATAGT-3' (RP) |
| At5g60390 (EF1a)              | 5'-TGAGCACGCTCTTCTTGCTTTCA-3' (FP);<br>5'-GGTGGTGGCATCCATCTTGTTACA-3' (RP)        |
| At2g28390 (SAND family)       | 5'-AACTCTATGCAGCATTTGATCCACT-3' (FP);<br>5'-TGATTGCATATCTTTATCGCCATC-3' (RP)      |
| At3g18780 (ACT2/8)            | 5'-GGTAACATTGTGCTCAGTGGTGG-3' (FP);<br>5'-AACGACCTTAATCTTCATGCTGC-3' (RP)         |

900

901

902 Supplemental Data Set 1. Relaxed network regulatory predictions from Gutierrez et al., 2008.

903

#### 904 **LITERATURE CITED**

905 Agarwal P, Reddy MP, Chikara J (2011) WRKY: its structure, evolutionary relationship, DNA-  
906 binding selectivity, role in stress tolerance and development of plants. Mol Biol Rep 38: 3883–  
907 3896

908

909 van Aken O, Zhang B, Law S, Narsai R, Whelan J (2013) AtWRKY40 and AtWRKY63  
910 modulate the expression of stress-responsive nuclear genes encoding mitochondrial and  
911 chloroplast proteins. *Plant Physiol* 162: 254–271  
912

913 Baena-Gonzalez E, Rolland F, Thevelein JM, Sheen J (2007) A central integrator of transcription  
914 networks in plant stress and energy signalling. *Nature* 448: 938–942  
915

916 Baena-Gonzalez E, Rolland F, Sheen J (2008) KIN10/11 are master regulators of the convergent  
917 stress transcriptome. In JF Allen, E Gantt, JH Golbeck, B Osmond, eds, *Photosynthesis. Energy  
918 from the Sun: 14th International Congress on Photosynthesis*, 1st ed. Springer, Dordrecht, The  
919 Netherlands, pp 1337–1344  
920

921 Baena-Gonzalez E, Sheen J (2008) Convergent energy and stress signaling. *Trends Plant Sci* 13:  
922 474–482  
923

924 Blaesing OE, Gibon Y, Guenther M, Hoehne M, Morcuende R, Osuna D, Thimm O, Usadel B,  
925 Scheible WR, Stitt M (2005) Sugars and circadian regulation make major contributions to the  
926 global regulation of diurnal gene expression in *Arabidopsis*. *Plant Cell* 17: 3257–3281  
927

928 Breitling R, Armengaud P, Amtmann A, Herzyk P (2004) Rank products: a simple, yet powerful,  
929 new method to detect differentially regulated genes in replicated microarray experiments. *FEBS  
930 Lett* 573: 83–92  
931

932 Chen L, Song Y, Li S, Zhang L, Zou C, Yu D (2012) The role of WRKY transcription factors in  
933 plant abiotic stresses. *Biochim Biophys Acta* 1819: 120–128  
934

935 Chen L, Zhang L, Li D, Wang F, Yu D (2013) WRKY8 transcription factor functions in the  
936 TMV-cg defense response by mediating both abscisic acid and ethylene signaling in  
937 *Arabidopsis*. *Proc Natl Acad Sci U S A*. doi: 10.1073/pnas.1221347110  
938

- 939 Contento AL, Kim SJ, Bassham DC (2004) Transcriptome profiling of the response of  
940 Arabidopsis suspension culture cells to Suc starvation. *Plant Physiol* 135: 2330–2347  
941
- 942 Devaiah BN, Karthikeyan AS, Raghothama KG (2007) WRKY75 transcription factor is a  
943 modulator of phosphate acquisition and root development in Arabidopsis. *Plant Physiol* 143:  
944 1789–1801  
945
- 946 Dietrich K, Weltmeier F, Ehlert A, Weiste C, Stahl M, Harter K, Droege-Laser W (2011)  
947 Heterodimers of the Arabidopsis transcription factors bZIP1 and bZIP53 reprogram amino acid  
948 metabolism during low energy stress. *Plant Cell* 23: 381–395  
949
- 950 Fiehn, O., Wohlgemuth, G., Scholz, M., Kind, T., Lee, D. Y., Lu, Y., Moon, S. & Nikolau, B.  
951 (2008). Quality control for plant metabolomics: reporting MSI-compliant studies. *The Plant*  
952 *Journal*, 53(4), 691-704.  
953
- 954 Fujiki Y, Yoshikawa Y, Sato T, Inada N, Ito M, Nishida I, Watanabe A (2001) Dark-inducible  
955 genes from Arabidopsis thaliana are associated with leaf senescence and repressed by sugars.  
956 *Physiol Plant* 111: 345–352  
957
- 958 Gaufichon, L, Rothstein, SJ, Suzuki, A. Asparagine Metabolic Pathways in Arabidopsis. *Plant*  
959 *and Cell Physiology*, Volume 57, Issue 4, April 2016, Pages 675–689,  
960 <https://doi.org/10.1093/pcp/pcv184>  
961
- 962 Gautier, L., Cope, L., Bolstad, B. M., Irizarry, R. A. (2004). affy-analysis of Affymetrix  
963 GeneChip data at the probe level. *Bioinformatics* 20, 3 (Feb. 2004), 307-315.  
964
- 965 Geisler-Lee J, Nicholas O’Toole, Ron Ammar, Nicholas J. Provart, A. Harvey Millar, and Matt  
966 Geisler. A Predicted Interactome for Arabidopsis. *Plant Physiology*, October 2007, Vol. 145, pp.  
967 317-329.  
968

969 Gutierrez RA, Lejay L V, Dean A, Chiaromonte F, Shasha DE, Coruzzi GM (2007) Qualitative  
970 network models and genome-wide expression data define carbon/nitrogen-responsive molecular  
971 machines in Arabidopsis. *Genome Biol* 8: R7  
972

973 Gutierrez RA, Stokes TL, Thum K, Xu X, Obertello M, Katari MS, Tanurdzic M, Dean A, Nero  
974 DC, McClung CR, Coruzzi GM (2008) Systems approach identifies an organic nitrogen-  
975 responsive gene network that is regulated by the master clock control gene CCA1. *Proc Natl*  
976 *Acad Sci U S A* 105: 4939–4944  
977

978 Jia H, Wang C, Wang F, Liu S, Li G, Guo X (2015) GhWRKY68 reduces resistance to salt and  
979 drought in transgenic *Nicotiana benthamiana*. *PLoS ONE* 10: e0120646  
980

981 Jonassen EM, Lea US, Lillo C (2008) HY5 and HYH are positive regulators of nitrate reductase  
982 in seedlings and rosette stage plants. *Planta* 227: 559–564  
983

984 Jonassen EM, Sevin DC, Lillo C (2009) The bZIP transcription factors HY5 and HYH are  
985 positive regulators of the main nitrate reductase gene in Arabidopsis leaves, NIA2, but negative  
986 regulators of the nitrate uptake gene NRT1.1. *J Plant Physiol* 166: 2071–2076  
987

988 Katari MS, Nowicki SD, Aceituno FF, Nero D, Kelfer J, Thompson LP, Cabello JM, Davidson  
989 RS, Goldberg AP, Shasha DE, Coruzzi GM, Gutierrez RA (2010) VirtualPlant: a software  
990 platform to support systems biology research. *Plant Physiol* 152: 500–515  
991

992 Krapp A, Berthome R, Orsel M, Mercey-Boutet S, Yu A, Castaings L, Elftieh S, Major H, Renou  
993 JP, Daniel-Vedele F (2011) Arabidopsis roots and shoots show distinct temporal adaptation  
994 patterns toward nitrogen starvation. *Plant Physiol* 157: 1255–1282  
995

996 Krouk G, Tranchina D, Lejay L, Cruikshank AA, Shasha D, Coruzzi GM, Gutierrez RA (2009)  
997 A systems approach uncovers restrictions for signal interactions regulating genome-wide  
998 responses to nutritional cues in Arabidopsis. *PLoS Comput Biol* 5: e1000326  
999

- 1000 Lam HM, Hsieh MH, Coruzzi G (1998) Reciprocal regulation of distinct asparagine synthetase  
1001 genes by light and metabolites in *Arabidopsis thaliana*. *Plant J* 16: 345–353  
1002
- 1003 Lea, P. J., Sodek, L., Parry, M. A. J., Shewry, P. R., and Halford, N. G. (2007). Asparagine in  
1004 plants. *Ann. Appl. Biol.* 150, 1–26.  
1005
- 1006 Lillo C (2008) Signaling cascades integrating light-enhanced nitrate metabolism. *Biochem J* 415:  
1007 11–19  
1008
- 1009 Maekawa S, Takabayashi A, Huarancca Reyes T, Yamamoto H, Tanaka A, Sato T, Yamaguchi J  
1010 (2015) Pale-green phenotype of *at131 at16* double mutant leaves is caused by disruption of 5-  
1011 aminolevulinic acid biosynthesis in *Arabidopsis thaliana*. *PLoS One* 10: e0117662  
1012
- 1013 Maere S, Heymans K, Kuiper M (2005) BiNGO: A Cytoscape plugin to assess  
1014 overrepresentation of Gene Ontology categories in Biological Networks. *Bioinformatics* 21:  
1015 3448–3449  
1016
- 1017 Matioli CC, Tomaz JP, Duarte GT, Prado FM, Del Bem LE, Silveira AB, Gauer L, Correa LG,  
1018 Drumond RD, Viana AJ, Di Mascio P, Meyer C, Vincentz M (2011) The *Arabidopsis* bZIP gene  
1019 *AtbZIP63* is a sensitive integrator of transient abscisic acid and glucose signals. *Plant Physiol*  
1020 157: 692–705  
1021
- 1022 Matt P, Geiger M, Walch-Liu P, Engels C, Krapp A, Stitt M (2001a) Elevated carbon dioxide  
1023 increases nitrate uptake and nitrate reductase activity when tobacco is growing on nitrate, but  
1024 increases ammonium uptake and inhibits nitrate reductase activity when tobacco is growing on  
1025 ammonium nitrate. *Plant, Cell, and Environment* 24: 1119–1137  
1026
- 1027 Matt P, Geiger M, Walch-Liu P, Engels C, Krapp A, Stitt M (2001b) The immediate cause of the  
1028 diurnal changes of nitrogen metabolism in leaves of nitrate-replete tobacco: a major imbalance  
1029 between the rate of nitrate reduction and the rates of nitrate uptake and ammonium metabolism  
1030 during the first part of the light period. *Plant, Cell, and Environment* 24: 177–190

1031  
1032 Nozue K, Harmer SL, Maloof JN (2011) Genomic analysis of circadian clock-, light-, and  
1033 growth-correlated genes reveals PHYTOCHROME-INTERACTING FACTOR5 as a modulator  
1034 of auxin signaling in Arabidopsis. *Plant Physiol* 156: 357–372  
1035  
1036 Nunes-Nesi A, Fernie AR, Stitt M (2010) Metabolic and signaling aspects underpinning the  
1037 regulation of plant carbon nitrogen interactions. *Mol Plant* 3: 973–996  
1038  
1039 Obertello M, Krouk G, Katari MS, Runko SJ, Coruzzi GM (2010) Modeling the global effect of  
1040 the basic-leucine zipper transcription factor 1 (bZIP1) on nitrogen and light regulation in  
1041 Arabidopsis. *BMC Syst Biol* 4: 111  
1042  
1043 Oliveira IC, Brenner E, Chiu J, Hsieh MH, Kouranov A, Lam HM, Shin MJ, Coruzzi G (2001)  
1044 Metabolite and light regulation of metabolism in plants: lessons from the study of a single  
1045 biochemical pathway. *Braz J Med Biol Res* 34: 567–575  
1046  
1047 Oliveira IC, Coruzzi GM (1999) Carbon and Amino Acids Reciprocally Modulate the  
1048 Expression of Glutamine Synthetase in Arabidopsis1. *Plant Physiol* 121: 301–309  
1049  
1050 Orlova, I., Marshall-Colón, A., Schnepf, J., Wood, B., Varbanova, M., Fridman, E., Blakeslee, J.  
1051 J., Peer, W. A., Murphy, A. S., Rhodes, D. & Pichersky, E. (2006). Reduction of benzenoid  
1052 synthesis in petunia flowers reveals multiple pathways to benzoic acid and enhancement in auxin  
1053 transport. *The Plant Cell*, 18(12), 3458-3475.  
1054  
1055 Para A, Li Y, Marshall-Colón A, Varala K, Francoeur NJ, Moran TM, Edwards MB, Hackley C,  
1056 Bargmann BO, Birnbaum KD, McCombie WR, Krouk G, Coruzzi GM (2014) Hit-and-run  
1057 transcriptional control by bZIP1 mediates rapid nutrient signaling in Arabidopsis. *Proc Natl*  
1058 *Acad Sci U S A* 111: 10371–10376  
1059  
1060 Prasch CM, Sonnewald U (2013) Simultaneous application of heat, drought, and virus to  
1061 Arabidopsis plants reveals significant shifts in signaling networks. *Plant Physiol* 162: 1849–1866



1062  
1063 Rasmussen S, Barah P, Suarez-Rodriguez MC, Bressendorff S, Friis P, Costantino P, Bones AM,  
1064 Nielsen HB, Mundy J (2013) Transcriptome responses to combinations of stresses in  
1065 Arabidopsis. *Plant Physiol* 161: 1783–1794  
1066  
1067 Reed AJ, Canvin DT, Sherrard JH, Hageman RH (1983) Assimilation of [15N]nitrate and  
1068 [15N]nitrite in leaves of five plant species under light and dark conditions. *Plant Physiol* 71:  
1069 291–294  
1070  
1071 Riens B, Heldt HW (1992) Decrease of nitrate reductase activity in spinach leaves during a light-  
1072 dark transition. *Plant Physiol* 98: 573–577  
1073  
1074 Rushton P, Somssich I, Ringler P, Shen Q (2010) WRKY transcription factors. *Trends Plant Sci*  
1075 15: 247–258  
1076  
1077 Schluempmann H, Pellny T, van Dijken A, Smeekens S, Paul M (2003) Trehalose 6-phosphate is  
1078 indispensable for carbohydrate utilization and growth in *Arabidopsis thaliana*. *Proc Natl Acad*  
1079 *Sci U S A* 100: 6849–6854  
1080  
1081 Seo PJ, Park CM (2010) MYB96-mediated abscisic acid signals induce pathogen resistance  
1082 response by promoting salicylic acid biosynthesis in *Arabidopsis*. *New Phytol* 186: 471–483  
1083 Thum KE, Shasha DE, Lejay LV, Coruzzi GM (2003) Light- and Carbon-Signaling Pathways.  
1084 Modeling Circuits of Interactions. *Plant Physiol* 32: 440–452  
1085  
1086 Tome F, Naegele T, Adamo M, Garg A, Marco-Llorca C, Nukarinen E, Pedrotti L, Peviani A,  
1087 Simeunovic A, Tatkiewicz A, Tomar M, Gamm M (2014) The low energy signaling network.  
1088 *Front Plant Sci* 5: 353  
1089  
1090 Tsai AY, Gazzarrini S (2014) Trehalose-6-phosphate and SnRK1 kinases in plant development  
1091 and signaling: the emerging picture. *Front Plant Sci* 5: 119  
1092

1093 UCLA: Statistical Consulting Group FAQ: How can I understand a three-way interaction in  
1094 ANOVA? FAQ: How can I understand a three-way interaction in ANOVA?  
1095 [http://www.ats.ucla.edu/stat/mult\\_pkg/faq/general/threewayanova.htm](http://www.ats.ucla.edu/stat/mult_pkg/faq/general/threewayanova.htm)

1096

1097 Urbanczyk-Wochniak E, Fernie AR (2005) Metabolic profiling reveals altered nitrogen nutrient  
1098 regimes have diverse effects on the metabolism of hydroponically-grown tomato (*Solanum*  
1099 *lycopersicum*) plants. *J Exp Bot*: 309–321

1100

1101 Vert G, Chory J (2011) Crosstalk in cellular signaling: background noise or the real thing? *Dev*  
1102 *Cell* 21: 985–991

1103

1104 Wang ZY, Tobin EM (1998) Constitutive expression of the CIRCADIAN CLOCK  
1105 ASSOCIATED 1 (CCA1) gene disrupts circadian rhythms and suppresses its own expression.  
1106 *Cell* 93: 1207–17

1107

1108 Waters MT, Wang P, Korkaric M, Capper RG, Saunders NJ, Langdale JA (2009) GLK  
1109 transcription factors coordinate expression of the photosynthetic apparatus in *Arabidopsis*. *Plant*  
1110 *Cell* 21: 1109–28

1111

1112 Wei W, Zhang Y, Han L, Guan Z, Chai T (2008) A novel WRKY transcriptional factor from  
1113 *Thlaspi caerulescens* negatively regulates the osmotic stress tolerance of transgenic tobacco.  
1114 *Plant Cell Rep* 27: 795–803

1115

1116 Wickham H. (2007). Reshaping Data with the reshape Package. *Journal of Statistical Software*,  
1117 21(12), 1-20.

1118

1119 Wickham H. (2017). tidyverse: Easily Install and Load the 'Tidyverse'. R package version 1.2.1.

1120

1121 Wu J, Irizarry R, with contributions from MacDonald, J, & Gentry J. (2018). *gcrma*:  
1122 Background Adjustment Using Sequence Information. R package version 2.54.0.

1123

- 1124 Xie Z, Zhang ZL, Zou X, Huang J, Ruas P, Thompson D, Shen QJ (2005) Annotations and  
1125 functional analyses of the rice WRKY gene superfamily reveal positive and negative regulators  
1126 of abscisic acid signaling in aleurone cells. *Plant Physiol* 137: 176–189  
1127
- 1128 Zhou X, Jiang Y, Yu D (2011) WRKY22 transcription factor mediates dark-induced leaf  
1129 senescence in *Arabidopsis*. *Mol Cells* 31: 303–313

**Figure 5. Genes commonly regulated by WRKY1, Nitrogen, and Light comprise a network of diverse biological functions.** Network of statistically overrepresented GO terms in the set of 724 genes with significant G x N x L interaction effect. Node area is proportional to the number of genes within the functional category (i.e. more genes equals larger node). Colored nodes are significantly overrepresented (see color legend), while white nodes are not significantly overrepresented (BinGO, Maere et al., 2005).

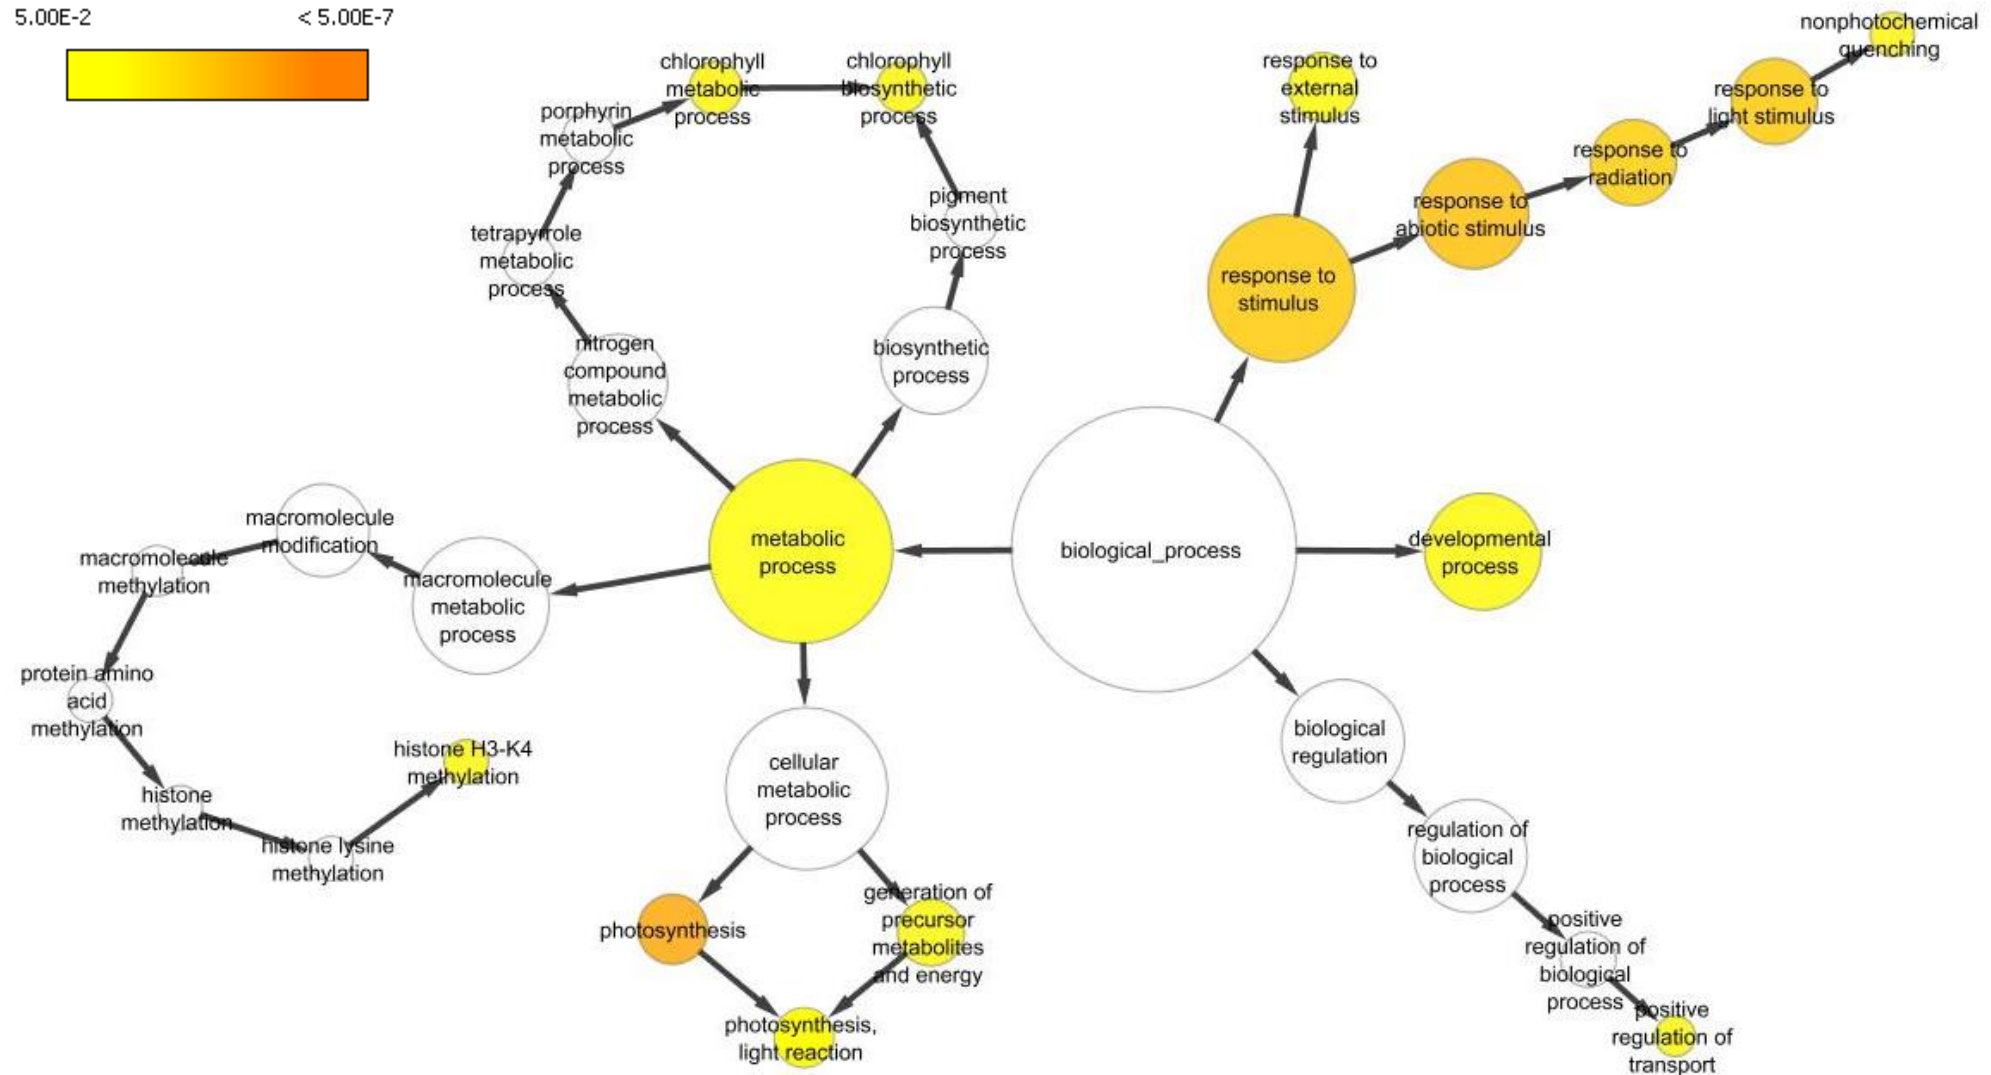

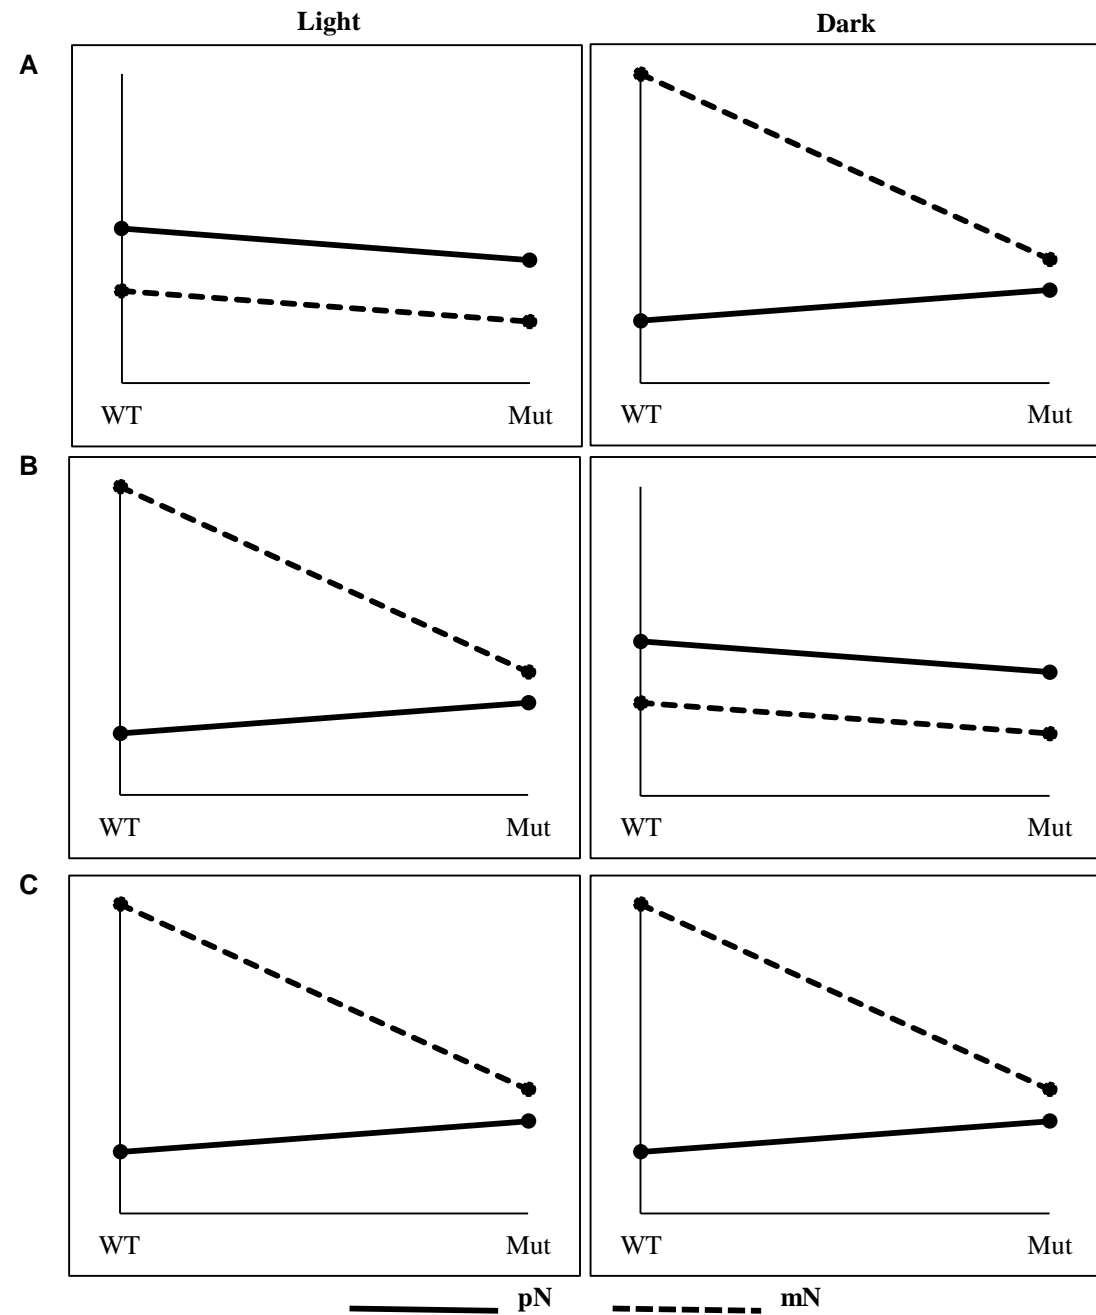

**Figure 6. Graphical representation of the sequential ANOVA to interpret the 3-way interaction term.** These plots represent the general observations for the 724 genes with significant three-way interaction. This example shows the three scenarios we observed for how gene expression changes in the light and the dark in response to the nitrogen variable across levels of the genotype variable. In our study, 78% of the genes only have a significant G x N interaction in the Dark (**A**), 12% of the genes only have a significant G x N interaction in the Light (**B**), and 10% of the genes have a significant G x N interaction in both Dark and Light conditions (**C**). WT = Col-0, Mut = *wrky1-1*.

**Figure 7. WRKY1 regulates genes in Light and Nitrogen pathways and is an integrator of Light and Nitrogen signaling.** Putative mechanism by which WRKY1 regulates different transcriptional programs under three conditions: A. Light treatment; B. Nitrogen treatment; C. Combined Light and Nitrogen treatment. The most significantly overrepresented GO terms for biological process are shown. Arrows indicate activation, lines and bars indicate repression. Percentages are the number of genes from a given group that adhere to the proposed mechanism in each panel. Shaded areas indicate dark conditions. +N = nitrogen treatment; -N = control treatment.

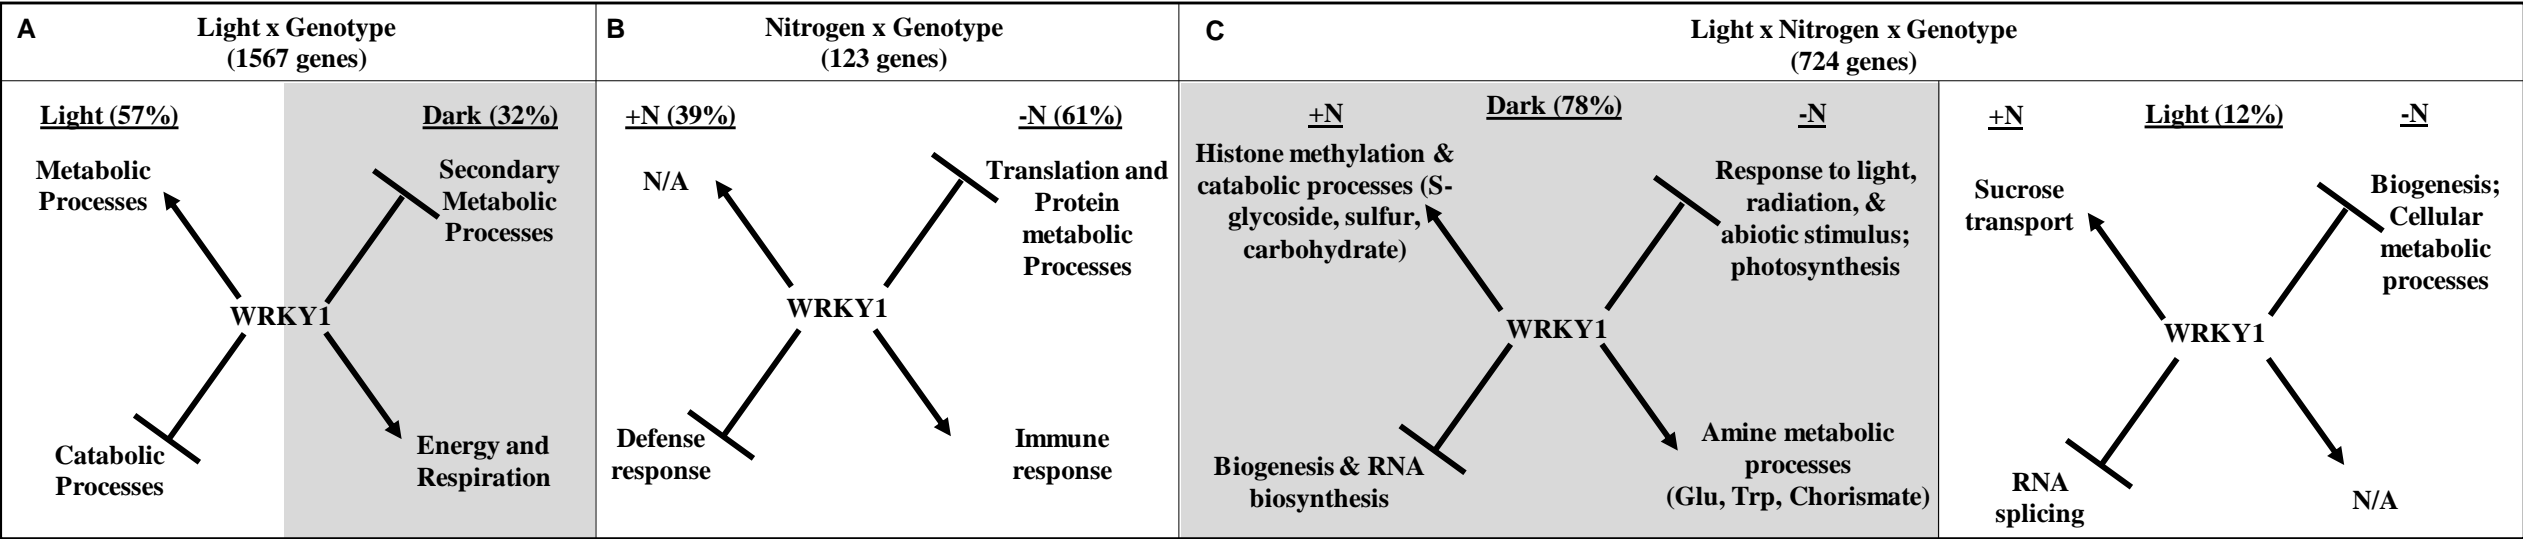

**Figure 8. Total N and C contents in WT and *wrky1-1* plants.** A. Total nitrogen by percent weight (mean  $\pm$  SD % by weight) in Col-0 and *wrky1-1* under 0mM and 50mM N supplement (Tukey's HSD, p-value < 0.05). B. Total carbon by percent weight (mean  $\pm$  SD % by weight) in Col-0 and *wrky1-1* under 0mM and 50mM N supplement (Tukey's HSD, p-value < 0.05).

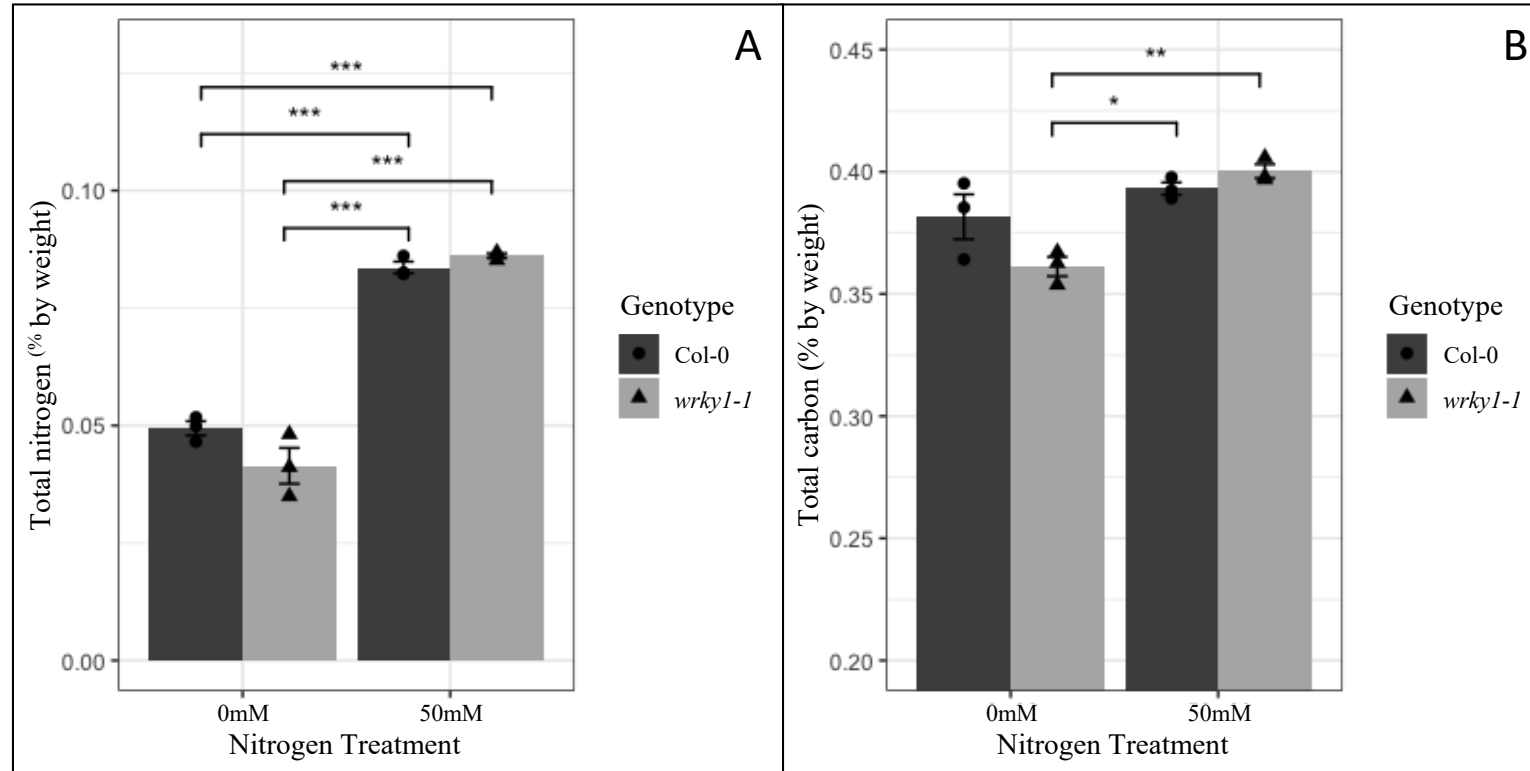

**Figure 9.** Measured metabolite levels (mean  $\pm$  SD nmols/mg) in Col-0 and *wrky1-1*. A. glutamine; B. aspartate; C. sucrose; and D. malate, under nitrogen treatment of 0.5mM  $\text{KNO}_3^-$  and 10.0mM  $\text{KNO}_3^-$  (T-test, p-value: + < 0.2, ++ < 0.1, \* < 0.05).

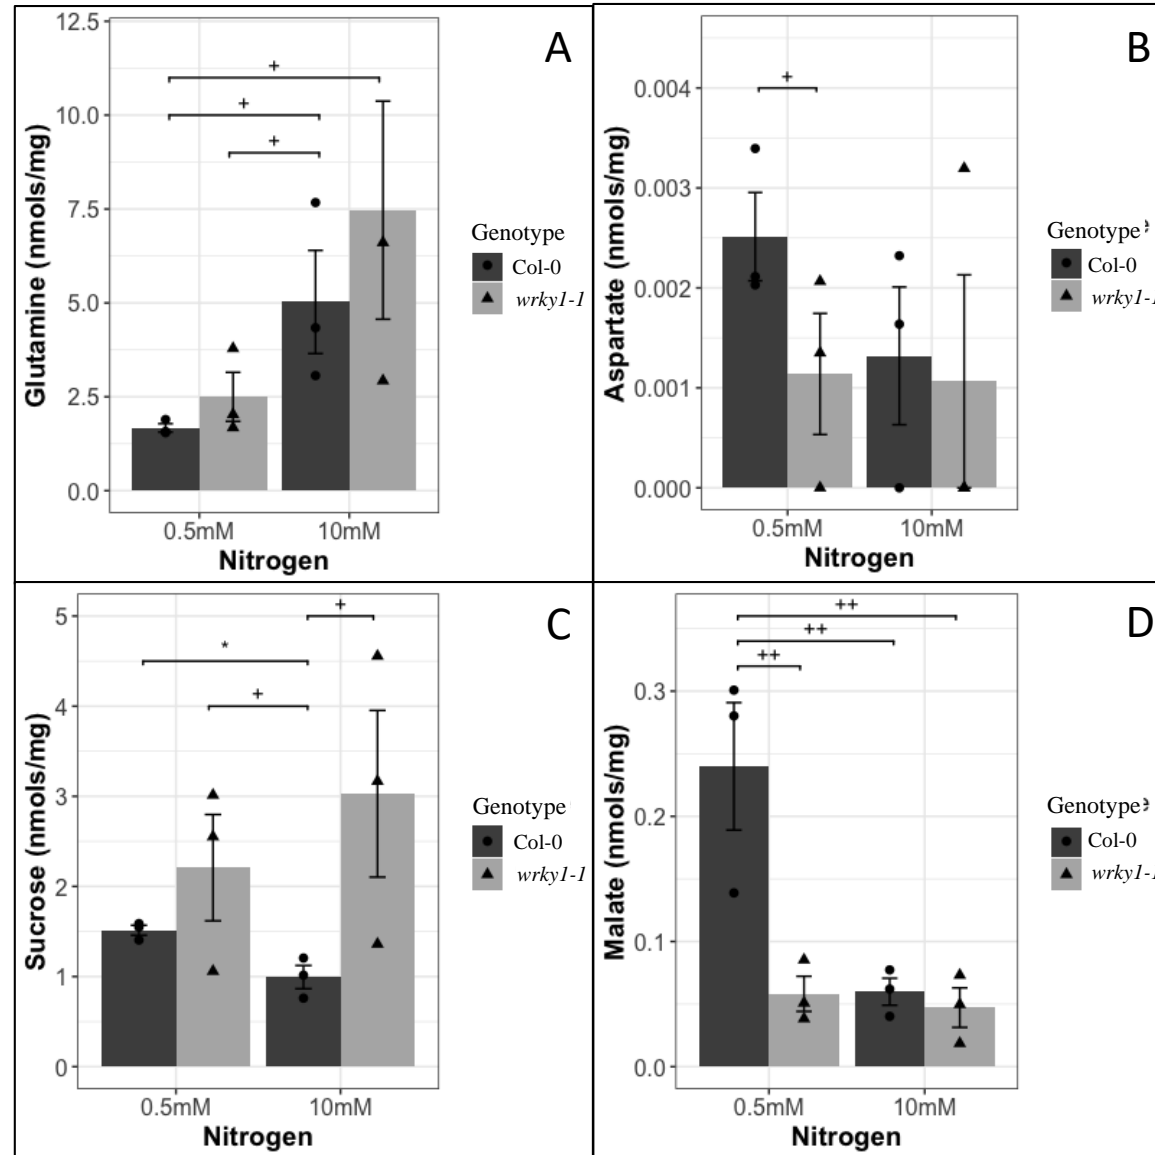



**A Transcriptome analysis of *wrky1* mutant.**

*wrky wrky wrky*  
Col-0 1-2 1-3 1-1

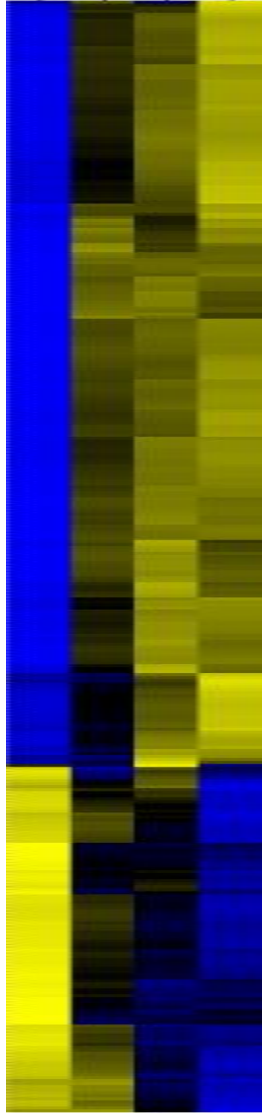

256 genes repressed by *At*WRKY1  
(Up regulated in *wrky1* mutants)  
Significant GO Terms (pval<0.01):

- Nucleic acid binding TF activity
- Response to carbohydrate stimulus
- Regulation of transcription
- Regulation of N compound metabolic process
- Response to light stimulus
- Response to brassinosteroid stimulus

117 genes induced by *At*WRKY1  
(Down regulated in *wrky1* mutants)  
Significant GO Terms (pval<0.01):

- Defense response to fungus
- Response to stress
- Response to SA stimulus

**B Comparison of *wrky1* mis-regulated genes with genes regulated by light and nitrogen.**

| <i>At</i> WRKY1 regulated genes | Light Regulated Genes |                 | Nitrogen regulated genes |                 |
|---------------------------------|-----------------------|-----------------|--------------------------|-----------------|
|                                 | Induced (483)         | Repressed (399) | Induced (285)            | Repressed (560) |
| Repressed (256)                 | 9                     | 53***           | 34***                    | 0               |
| Induced (117)                   | 20***                 | 3               | 7***                     | 10***           |

\*\*\*pval<0.001

**C WRKY1 gene expression is repressed by nitrogen and induced by light.**

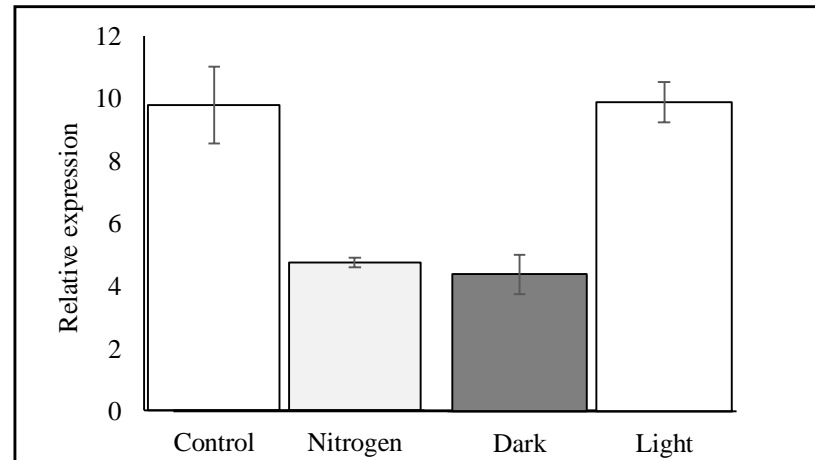

Error bars are standard error of the mean from 3 biological replicates.

**Figure 1. Down-regulation of WRKY1 results in mis-regulation of genes involved in light, nitrogen, and stress response pathways.**

**A.** Transcriptome analysis of WT (Col-0) and mutant *wrky1-1* (SALK\_070989), *wrky1-2* (SALK\_016954) and *wrky1-3* (SALK\_136009) seedlings. Heat map of transcriptome data includes genes with significant (pval<0.01; FDR 5%) change in expression from WT in *wrky1-1* and *wrky1-2* or *wrky1-3*. Top significantly (pval<0.01) overrepresented GO terms are listed.

**B.** Significance of overlaps (pval<0.001) of WRKY1 regulated, light regulated (Nozue et al., 2013), and nitrogen regulated (Gutierrez et al., 2008) gene sets were calculated using the GeneSect (R)script using the microarray as background. Total number of genes are inside parentheses; number of overlapping genes are shown in boxes. Boxes in yellow have p-value <0.001, indicating the size of the intersection is higher than expected.

**C.** Relative expression levels of WRKY1 in WT (Col-0) seedlings in response to nitrogen (control is 20 mM KCl, treatment is 20 mM NH<sub>4</sub>NO<sub>3</sub> + 20 mM KNO<sub>3</sub>) and light treatments (control is normal long day, treatment is extended dark). Error bars are standard error of the mean; 3 biological replicates.

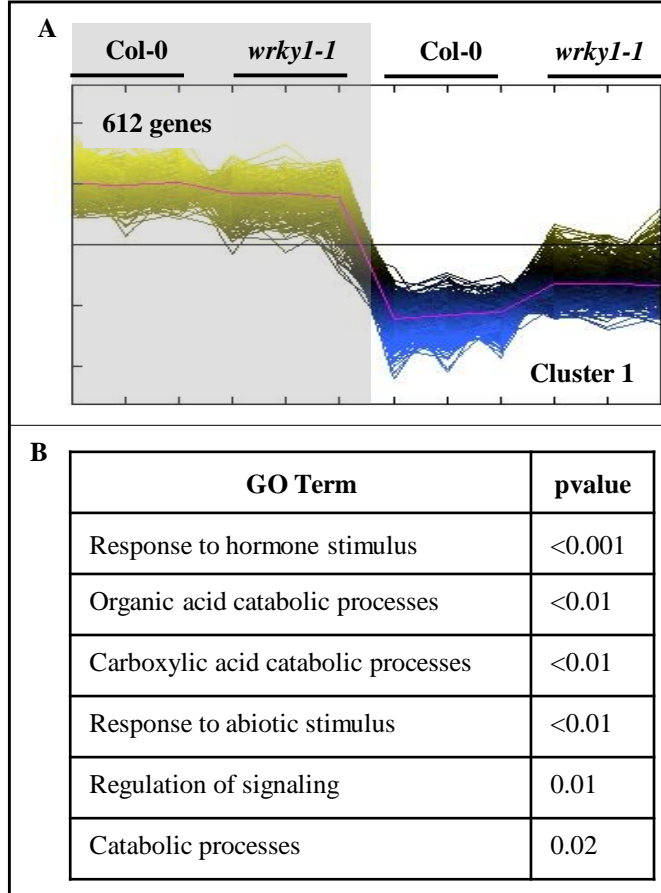

**Figure 2. Cluster analysis of genes with significant Genotype x Light interaction reveal loss of light repression for some dark inducible genes. A.** Cluster analysis of genes with significant (pval<0.02, FDR 5%) Genotype x Light interaction effect (1567 genes). Shaded area indicated dark conditions. Only Cluster 1 is shown, full cluster analysis can be viewed in Supplemental Figure 3. **B.** GO term analysis of gene cluster 1 with significant GxL effect.

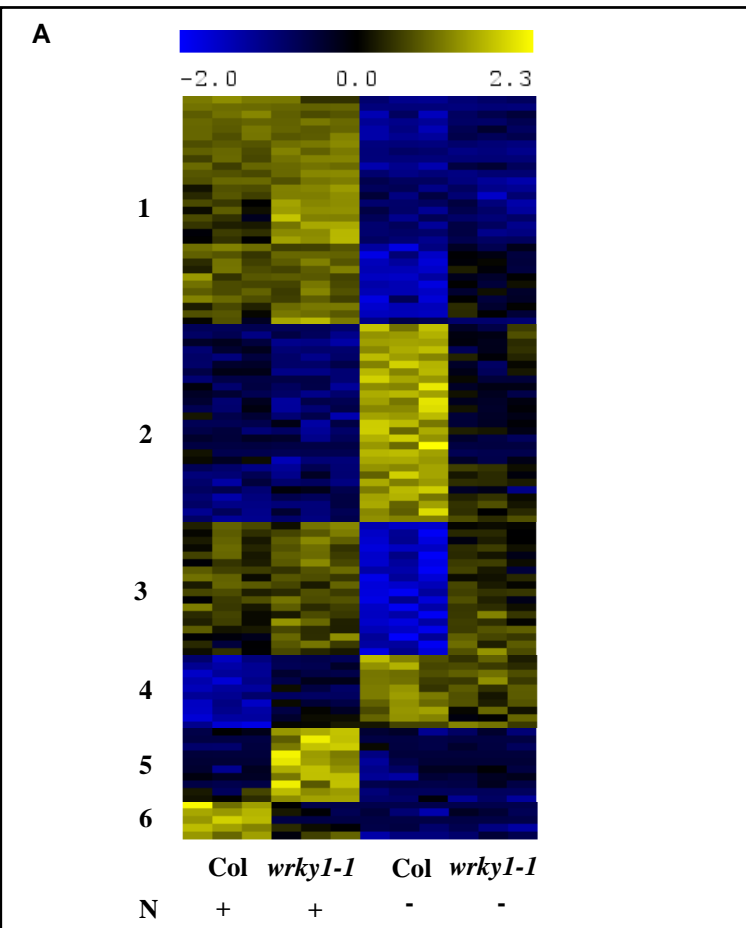

**Figure 3. Cluster analysis of genes with significant Nitrogen x Genotype effect reveal that WRKY1 participates in plant response to N-limitation. A.** Cluster analysis of genes with significant (pval<0.02, FDR 5%) Genotype x Nitrogen interaction effect (123 genes). **B.** GO term analysis of gene clusters with significant GxN effect.

**B**

| Cluster | GO Term                                              | pvalue             |
|---------|------------------------------------------------------|--------------------|
| 1       | Cellular homeostasis                                 | 0.0009             |
| 2       | Apoptosis                                            | 0.11               |
| 3       | Translation<br>Cellular protein metabolic process    | 2.7E-11<br>7.89E-7 |
| 4       | Regulation of defense response by callose deposition | 0.08               |
| 5       | N/A                                                  | N/A                |
| 6       | N/A                                                  | N/A                |

**Figure 4. Combinatorial treatment of *wrky1* mutants and WT with Nitrogen and Light results in a significant 3-way GxLxN interaction.** Cluster analysis of genes with significant ( $p$ -value < 0.01, FDR 5%) Genotype x Nitrogen x Light interaction effect (724 genes). **B.** GO term analysis of gene clusters with significant GxNxL effect. Shaded area indicated dark conditions. N = Nitrogen treatment; KCl = control treatment; Col = Col-0; *wrky1* = *wrky1-1*.

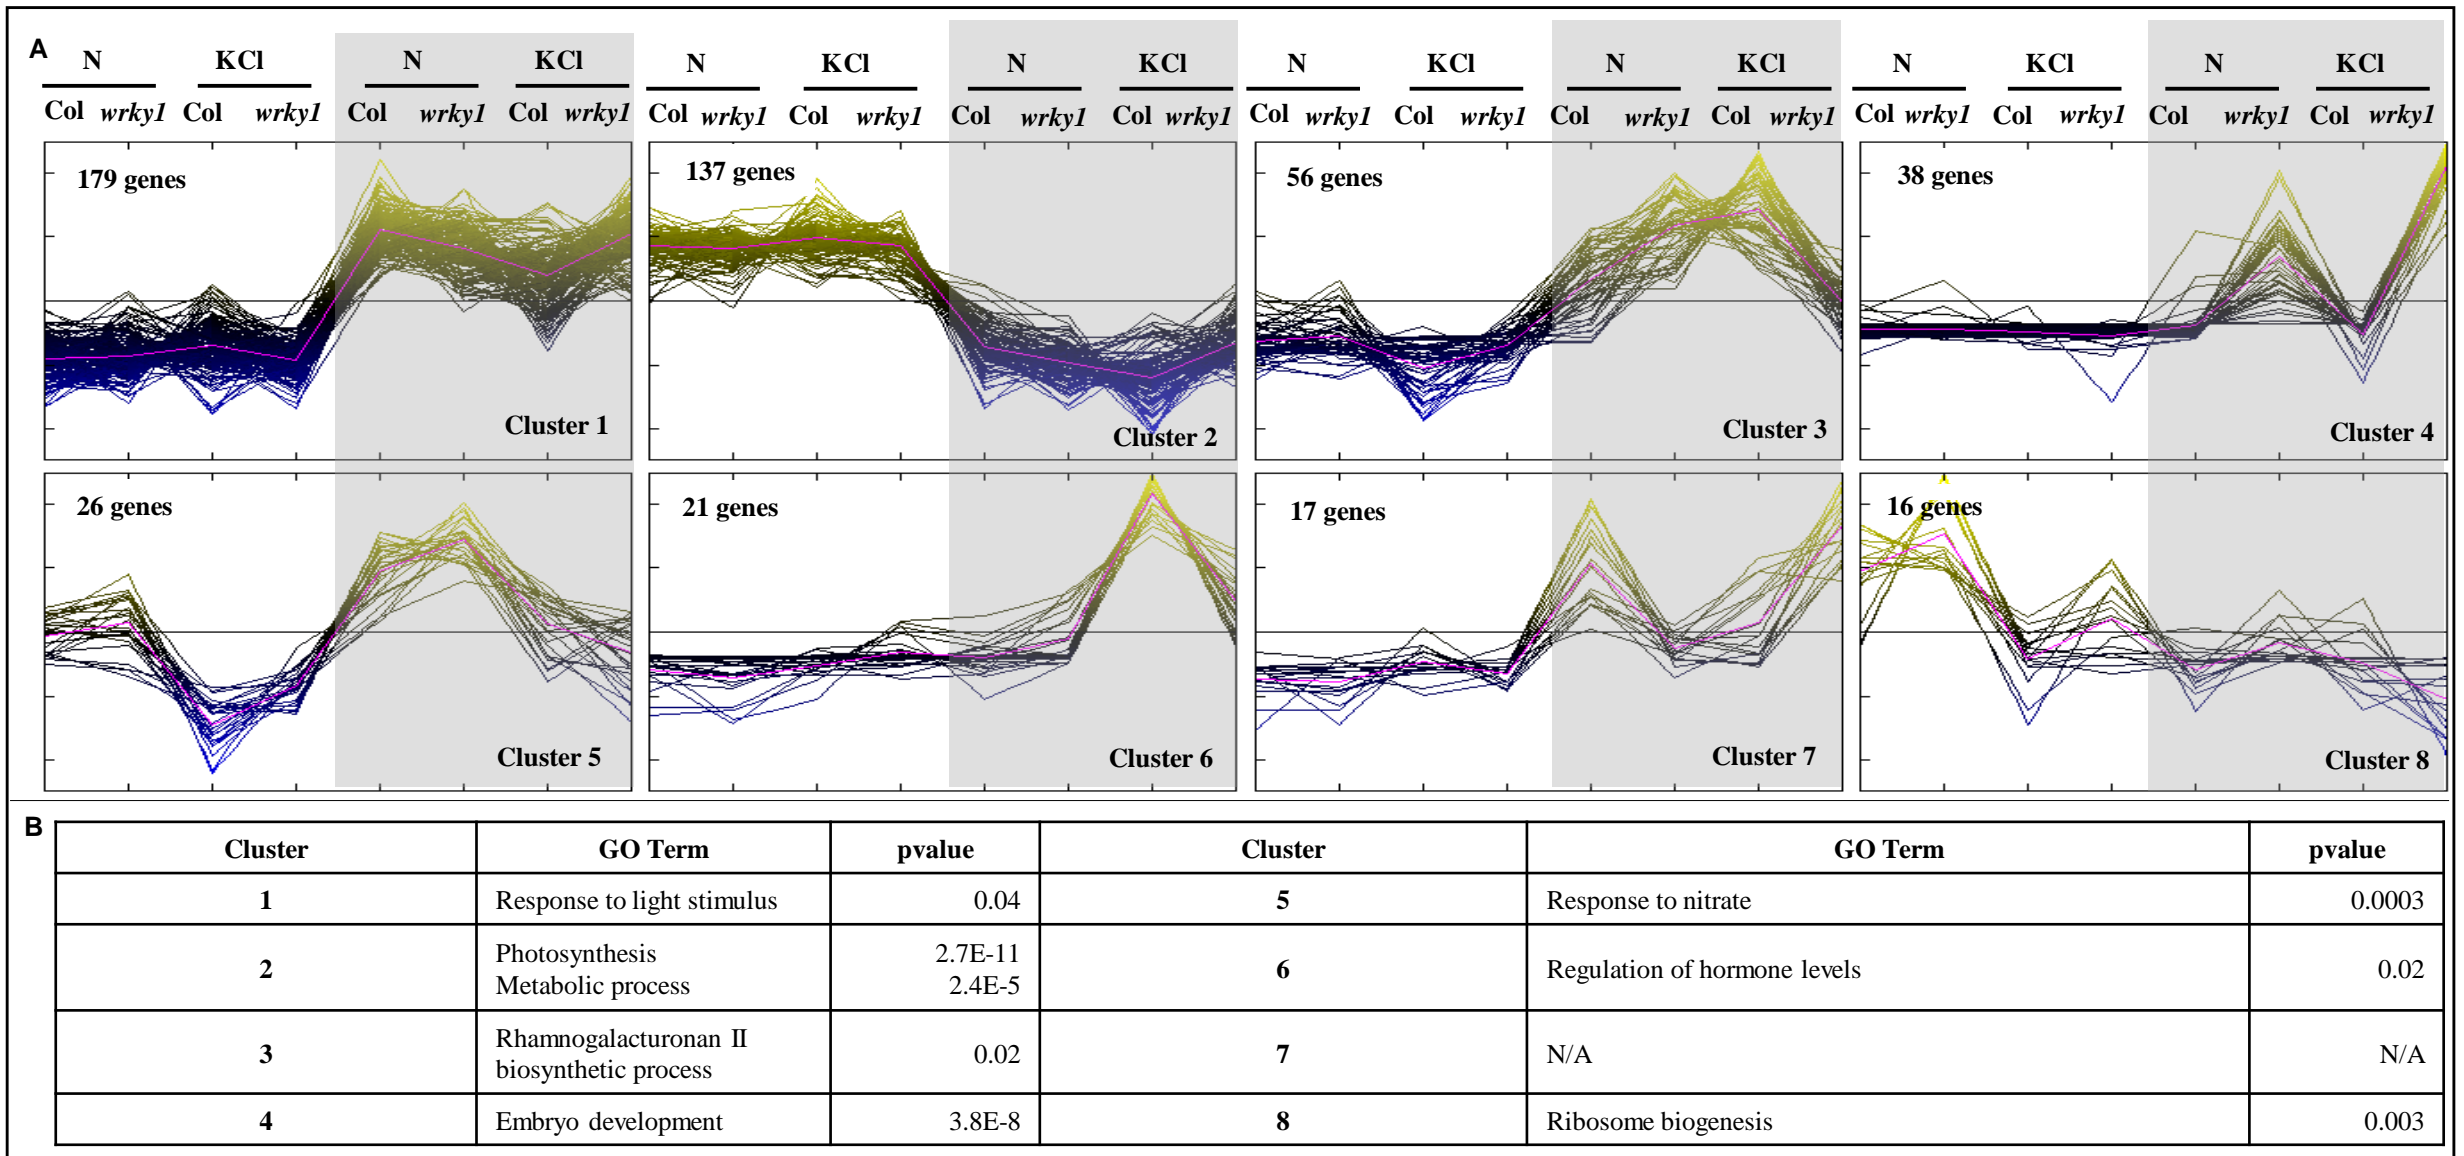

Source: https://www.biorxiv.org/content/10.1101/603142v2.full.pdf
